# Supplementary material for: A Major and Stable Quantitative Trait Locus qSS2 for Seed Size and Shape Traits in a Soybean RIL Population
Source: Front Genet. 2021 Apr 16;12:646102. doi: 10.3389/fgene.2021.646102 (PMC8085556; doi:10.3389/fgene.2021.646102)
Supplement: Supplementary Table 8 — Predicted protein coding genes in the physical interval of qSS2 and their annotation information according to Williams 82 assembly Gmax version 2.0 in SoyBase. [file Table_8.XLSX]

## Sheet: soybase_genome_annotation_02-21
Table S8. Predicted protein coding genes in the physical interval of qSS2 and their annotation information according to Williams 82 assembly Gmax version 2.0 in SoyBase
Gmax 2.0 Primary Protein ID (1)	Protein Length (AA)	Top Uniref100 BLASTP Hit (2)	E-value (E<10-6)	% Coverage	Top Descriptive Uniref100 BLASTP Hit (3)	E-value (E<10-6)	% Coverage	Top Arabidopsis (TAIR10) BLASTP Hit (4)	E-value (E<10-6)	Coverage	Gene Ontology Biological Process IDs (5)	Gene Ontology Biological Process Descriptions	Gene Ontology Molecular Function IDs (6)	Gene Ontology Molecular Function Descriptions	Gene Ontology Cellular Component IDs (7)	Gene Ontology Cellular Component Descriptions	PFAM IDs (8)	PFAM_Descriptions	Panther IDs (9)	Panther_Descriptions	KOG IDs (10)	KOG_Desctiptions
Glyma.02G269000	473	UniRef100_I1JIJ8 Uncharacterized protein n=1 Tax=Glycine max RepID=I1JIJ8_SOYBN	0	100	UniRef100_G7K7I0 Glucan endo-1,3-beta-glucosidase n=1 Tax=Medicago truncatula RepID=G7K7I0_MEDTR	0	97.45	AT2G05790.1|Symbols:|O-Glycosyl hydrolases family 17 protein|chr2:2199450-2201293 FORWARD LENGTH=472	0	96.61	GO:0005975 GO:0007389 GO:0008356 GO:0008361 GO:0009926 GO:0010015 GO:0010075 GO:0040007	asymmetric cell division; auxin polar transport; carbohydrate metabolic process; growth; pattern specification process; regulation of cell size; regulation of meristem growth; root morphogenesis	GO:0003824 GO:0004553 GO:0043169	catalytic activity; cation binding; hydrolase activity, hydrolyzing O-glycosyl compounds	GO:0005886	plasma membrane	PF07983 PF00332	X8 domain; Glycosyl hydrolases family 17	PTHR16631	FAMILY NOT NAMED	NA	NA
Glyma.02G269100	317	UniRef100_I1JIJ9 Uncharacterized protein n=1 Tax=Glycine max RepID=I1JIJ9_SOYBN	7e-58	24.71	UniRef100_G7K7I9 DNA-directed RNA polymerase subunit beta n=1 Tax=Medicago truncatula RepID=G7K7I9_MEDTR	5e-52	21.6	AT4G08850.1|Symbols:|Leucine-rich repeat receptor-like protein kinase family protein|chr4:5636693-5640496 REVERSE LENGTH=1045	2e-31	15.02	GO:0006468 GO:0006857 GO:0006995 GO:0009627 GO:0031347	cellular response to nitrogen starvation; oligopeptide transport; protein phosphorylation; regulation of defense response; systemic acquired resistance	GO:0004672 GO:0004713 GO:0005524 GO:0016301 GO:0016772	ATP binding; kinase activity; protein kinase activity; protein tyrosine kinase activity; transferase activity, transferring phosphorus-containing groups	GO:0005634 GO:0005886 GO:0009506 GO:0016020	membrane; nucleus; plasma membrane; plasmodesma	PF00560	Leucine Rich Repeat	PTHR24420	LEUCINE-RICH REPEAT RECEPTOR-LIKE PROTEIN KINASE	NA	NA
Glyma.02G269200	1041	UniRef100_I1JIJ9 Uncharacterized protein n=1 Tax=Glycine max RepID=I1JIJ9_SOYBN	0	100	UniRef100_G7K7I9 DNA-directed RNA polymerase subunit beta n=1 Tax=Medicago truncatula RepID=G7K7I9_MEDTR	0	85.13	AT4G08850.1|Symbols:|Leucine-rich repeat receptor-like protein kinase family protein|chr4:5636693-5640496 REVERSE LENGTH=1045	0	90.24	GO:0006468 GO:0006857 GO:0006995 GO:0009627 GO:0031347	cellular response to nitrogen starvation; oligopeptide transport; protein phosphorylation; regulation of defense response; systemic acquired resistance	GO:0004672 GO:0004713 GO:0005524 GO:0016301 GO:0016772	ATP binding; kinase activity; protein kinase activity; protein tyrosine kinase activity; transferase activity, transferring phosphorus-containing groups	GO:0005634 GO:0005886 GO:0009506 GO:0016020	membrane; nucleus; plasma membrane; plasmodesma	PF00069 PF00560 PF08263	Protein kinase domain; Leucine Rich Repeat; Leucine rich repeat N-terminal domain	PTHR24420	LEUCINE-RICH REPEAT RECEPTOR-LIKE PROTEIN KINASE	KOG1187	Serine/threonine_protein_kinase
Glyma.02G269300	558	UniRef100_K7KB14 Uncharacterized protein n=2 Tax=Glycine max RepID=K7KB14_SOYBN	0	100	UniRef100_B9IAJ7 Xanthine/uracil permease family protein n=1 Tax=Populus trichocarpa RepID=B9IAJ7_POPTR	0	100	AT2G05760.1|Symbols:|Xanthine/uracil permease family protein|chr2:2180978-2183710 FORWARD LENGTH=520	0	100.19	GO:0006810 GO:0055085	transmembrane transport; transport	GO:0005215 GO:0022857	transmembrane transporter activity; transporter activity	GO:0005737 GO:0009506 GO:0016020	cytoplasm; membrane; plasmodesma	PF00860	Permease family	PTHR11119	XANTHINE-URACIL / VITAMIN C PERMEASE FAMILY MEMBER	KOG1292	Xanthine/uracil_transporters
Glyma.02G269400	525	UniRef100_I1JIK1 Uncharacterized protein n=1 Tax=Glycine max RepID=I1JIK1_SOYBN	0	100	UniRef100_G7K7J2 Endoglucanase n=1 Tax=Medicago truncatula RepID=G7K7J2_MEDTR	0	99.81	AT2G32990.1|Symbols:AtGH9B8, GH9B8|glycosyl hydrolase 9B8|chr2:14003361-14005844 FORWARD LENGTH=525	0	92.76	GO:0005975	carbohydrate metabolic process	GO:0003824 GO:0004553	catalytic activity; hydrolase activity, hydrolyzing O-glycosyl compounds	GO:0005576	extracellular region	PF00759	Glycosyl hydrolase family 9	PTHR22298	ENDO-1,4-BETA-GLUCANASE	NA	NA
Glyma.02G269500	459	UniRef100_I1JIK2 Uncharacterized protein n=1 Tax=Glycine max RepID=I1JIK2_SOYBN	0	100	UniRef100_Q9FII0 Calcineurin-like metallo-phosphoesterase-like protein n=1 Tax=Arabidopsis thaliana RepID=Q9FII0_ARATH	0	93.29	AT5G42370.1|Symbols:|Calcineurin-like metallo-phosphoesterase superfamily protein|chr5:16939329-16941463 REVERSE LENGTH=447	0	93.29	GO:0008150	biological process	GO:0003674	molecular function	NA	NA	PF09423	PhoD-like phosphatase	NA	NA	NA	NA
Glyma.02G269600	647	UniRef100_I1JIK3 Uncharacterized protein n=1 Tax=Glycine max RepID=I1JIK3_SOYBN	0	100	UniRef100_A5YJW4 LYK8 n=1 Tax=Glycine max RepID=A5YJW4_SOYBN	0	97.44	AT2G33580.1|Symbols:|Protein kinase superfamily protein|chr2:14219848-14221842 REVERSE LENGTH=664	0	96.23	GO:0010200 GO:0071323	cellular response to chitin; response to chitin	GO:0008061 GO:0016301	chitin binding; kinase activity	GO:0005576 GO:0005886	extracellular region; plasma membrane	PF00069 PF01476	Protein kinase domain; LysM domain	PTHR24420	LEUCINE-RICH REPEAT RECEPTOR-LIKE PROTEIN KINASE	KOG1187	Serine/threonine_protein_kinase
Glyma.02G269700	589	UniRef100_I1JIK5 Uncharacterized protein n=2 Tax=Glycine max RepID=I1JIK5_SOYBN	0	100	UniRef100_D5LQ68 Nitrate transporter n=3 Tax=Medicago truncatula RepID=D5LQ68_MEDTR	0	99.83	AT3G21670.1|Symbols:|Major facilitator superfamily protein|chr3:7626942-7628954 REVERSE LENGTH=590	0	96.27	GO:0006857	oligopeptide transport	GO:0005215	transporter activity	GO:0005886 GO:0016020	membrane; plasma membrane	PF00854	POT family	PTHR11654	OLIGOPEPTIDE TRANSPORTER-RELATED	KOG1237	H+/oligopeptide_symporter
Glyma.02G269800	108	UniRef100_I1JIK6 Uncharacterized protein n=1 Tax=Glycine max RepID=I1JIK6_SOYBN	3e-72	100	UniRef100_B9GTU5 Ribosomal protein L30 n=1 Tax=Populus trichocarpa RepID=B9GTU5_POPTR	2e-57	100	AT5G55140.1|Symbols:|ribosomal protein L30 family protein|chr5:22381370-22381787 FORWARD LENGTH=109	6e-46	97.25	GO:0006354 GO:0006412 GO:0042254	DNA-dependent transcription, elongation; ribosome biogenesis; translation	GO:0003735	structural constituent of ribosome	GO:0005840 GO:0015934	large ribosomal subunit; ribosome	PF00327	Ribosomal protein L30p/L7e	NA	NA	NA	NA
Glyma.02G269900	296	UniRef100_K7KB19 Uncharacterized protein n=1 Tax=Glycine max RepID=K7KB19_SOYBN	0	100	UniRef100_A5Y4H1 Class I KNOX homeobox transcription factor n=3 Tax=Medicago truncatula RepID=A5Y4H1_MEDTR	2e-113	94.55	AT1G62360.1|Symbols:STM, BUM1, SHL, WAM1, BUM, WAM|KNOX/ELK homeobox transcription factor|chr1:23058796-23061722 REVERSE LENGTH=382	9e-67	58.64	GO:0006355 GO:0007389 GO:0009691 GO:0009855 GO:0009886 GO:0009887 GO:0009909 GO:0009934 GO:0010051 GO:0010093 GO:0019827 GO:0048438 GO:0048439 GO:0048440 GO:0048481 GO:0048507 GO:0048513 GO:0048519	carpel development; cytokinin biosynthetic process; determination of bilateral symmetry; floral whorl development; flower morphogenesis; meristem development; negative regulation of biological process; organ development; organ morphogenesis; ovule development; pattern specification process; post-embryonic morphogenesis; regulation of flower development; regulation of meristem structural organizat…	GO:0003677 GO:0003700 GO:0005515 GO:0043565	DNA binding; protein binding; sequence-specific DNA binding; sequence-specific DNA binding transcription factor activity	GO:0005634	nucleus	PF00046 PF03791 PF03790	Homeobox domain; KNOX2 domain ; KNOX1 domain	PTHR11850	HOMEOBOX PROTEIN TRANSCRIPTION FACTORS	KOG0773	Transcription_factor_MEIS1_and_related_HOX_domain_proteins
Glyma.02G270000	409	UniRef100_I1JIK8 Uncharacterized protein n=1 Tax=Glycine max RepID=I1JIK8_SOYBN	0	100	UniRef100_G7K7K7 UBA and UBX domain-containing protein n=2 Tax=Medicago truncatula RepID=G7K7K7_MEDTR	0	96.45	AT4G15410.1|Symbols:PUX5|serine/threonine protein phosphatase 2A 55 kDa regulatory subunit B prime gamma|chr4:8814868-8816596 FORWARD LENGTH=421	5e-134	94.54	GO:0008150	biological process	GO:0005515	protein binding	GO:0005634	nucleus	PF00789 PF08059	UBX domain; SEP domain	PTHR23333	UBX DOMAIN CONTAINING PROTEIN	KOG2086	Protein_tyrosine_phosphatase_SHP1/Cofactor_for_p97_ATPase-mediated_vesicle_membrane_fusion
Glyma.02G270100	966	UniRef100_I1JIL0 Uncharacterized protein n=1 Tax=Glycine max RepID=I1JIL0_SOYBN	0	100	UniRef100_G7K7K8 Protein FAM91A1 n=1 Tax=Medicago truncatula RepID=G7K7K8_MEDTR	0	91.55	AT1G35220.1|Symbols:|unknown protein; FUNCTIONS IN: molecular_function unknown; INVOLVED IN: biological_process unknown; LOCATED IN: cellular_component unknown; EXPRESSED IN: 22 plant structures; EXPRESSED DURING: 13 growth stages; Has 313 Blast hits to 185 proteins in 75 species: Archae - 0; Bacteria - 0; Metazoa - 200; Fungi - 0; Plants - 67; Viruses - 0; Other Eukaryotes - 46 (source: NCBI BLi…	0	94.43	GO:0008150	biological process	GO:0003674	molecular function	GO:0005634	nucleus	NA	NA	NA	NA	KOG3707	Uncharacterized_conserved_protein
Glyma.02G270200	167	UniRef100_I1JIL1 Uncharacterized protein n=2 Tax=Glycine max RepID=I1JIL1_SOYBN	3e-116	93.79	UniRef100_Q9SF20 F26K24.7 protein n=1 Tax=Arabidopsis thaliana RepID=Q9SF20_ARATH	3e-34	96.08	AT3G11780.1|Symbols:|MD-2-related lipid recognition domain-containing protein / ML domain-containing protein|chr3:3724326-3725476 REVERSE LENGTH=153	3e-37	96.08	GO:0008150 GO:0010167 GO:0015706	biological process; nitrate transport; response to nitrate	GO:0003674	molecular function	GO:0005576 GO:0005773	extracellular region; vacuole	PF02221	ML domain	NA	NA	KOG4680	Uncharacterized_conserved_protein,_contains_ML_domain
Glyma.02G270300	538	UniRef100_I1JIL3 Uncharacterized protein n=1 Tax=Glycine max RepID=I1JIL3_SOYBN	0	100	UniRef100_B9GTV0 Serine/threonine protein phosphatase 2A regulatory subunit B n=1 Tax=Populus trichocarpa RepID=B9GTV0_POPTR	0	104.47	AT4G15415.1|Symbols:ATB' GAMMA|Protein phosphatase 2A regulatory B subunit family protein|chr4:8817707-8819349 FORWARD LENGTH=522	0	101.15	GO:0006555 GO:0007165 GO:0010090 GO:0031348 GO:0090342	methionine metabolic process; negative regulation of defense response; regulation of cell aging; signal transduction; trichome morphogenesis	GO:0008266 GO:0008601	poly(U) RNA binding; protein phosphatase type 2A regulator activity	GO:0000159 GO:0005634	nucleus; protein phosphatase type 2A complex	PF01603	Protein phosphatase 2A regulatory B subunit (B56 family)	PTHR10257	SERINE/THREONINE PROTEIN PHOSPHATASE 2A (PP2A) REGULATORY SUBUNIT B	KOG2085	Serine/threonine_protein_phosphatase_2A,_regulatory_subunit
Glyma.02G270400	145	UniRef100_C6TK04 Uncharacterized protein n=1 Tax=Glycine max RepID=C6TK04_SOYBN	1e-101	100	UniRef100_B0BLJ6 CM0545.540.nc protein n=1 Tax=Lotus japonicus RepID=B0BLJ6_LOTJA	7e-85	100	AT2G32180.1|Symbols:PTAC18|plastid transcriptionally active 18|chr2:13672362-13672781 REVERSE LENGTH=139	2e-63	102.88	GO:0008150	biological process	GO:0003674	molecular function	GO:0009295 GO:0009507 GO:0009508	chloroplast; nucleoid; plastid chromosome	PF05899	Protein of unknown function (DUF861)	NA	NA	NA	NA
Glyma.02G270500	253	UniRef100_I1JIL6 Uncharacterized protein n=1 Tax=Glycine max RepID=I1JIL6_SOYBN	0	100	NA	NA	NA	AT1G05060.1|Symbols:|unknown protein; Has 34 Blast hits to 34 proteins in 13 species: Archae - 0; Bacteria - 0; Metazoa - 0; Fungi - 0; Plants - 34; Viruses - 0; Other Eukaryotes - 0 (source: NCBI BLink).|chr1:1451255-1452858 REVERSE LENGTH=253	5e-100	98.42	GO:0042991	transcription factor import into nucleus	GO:0003674	molecular function	GO:0009507	chloroplast	NA	NA	NA	NA	NA	NA
Glyma.02G270600	74	UniRef100_E9L568 CLE22 protein n=1 Tax=Glycine max RepID=E9L568_SOYBN	5e-46	100	UniRef100_E9L568 CLE22 protein n=1 Tax=Glycine max RepID=E9L568_SOYBN	5e-46	100	NA	NA	NA	NA	NA	NA	NA	NA	NA	NA	NA	NA	NA	NA	NA
Glyma.02G270700	614	UniRef100_K7KB20 Uncharacterized protein n=1 Tax=Glycine max RepID=K7KB20_SOYBN	0	100	UniRef100_A5YJW5 LYK2 n=1 Tax=Glycine max RepID=A5YJW5_SOYBN	0	102.17	AT3G21630.1|Symbols:CERK1, LYSM RLK1|chitin elicitor receptor kinase 1|chr3:7615543-7618530 REVERSE LENGTH=617	0	97.57	GO:0002679 GO:0002752 GO:0006468 GO:0006612 GO:0006944 GO:0009627 GO:0009697 GO:0009817 GO:0010200 GO:0010363 GO:0030968 GO:0031347 GO:0032491 GO:0032499 GO:0035556 GO:0042742 GO:0043069 GO:0045087 GO:0046777 GO:0071219 GO:0071323	cell surface pattern recognition receptor signaling pathway; cellular membrane fusion; cellular response to chitin; cellular response to molecule of bacterial origin; defense response to bacterium; defense response to fungus, incompatible interaction; detection of molecule of fungal origin; detection of peptidoglycan; endoplasmic reticulum unfolded protein response; innate immune response; intrac…	GO:0004674 GO:0005515 GO:0008061 GO:0016301 GO:0019199 GO:0042803 GO:2001080	chitin binding; chitosan binding; kinase activity; protein binding; protein homodimerization activity; protein serine/threonine kinase activity; transmembrane receptor protein kinase activity	GO:0005576 GO:0005886	extracellular region; plasma membrane	PF07714	Protein tyrosine kinase	PTHR24420	LEUCINE-RICH REPEAT RECEPTOR-LIKE PROTEIN KINASE	KOG1187	Serine/threonine_protein_kinase
Glyma.02G270800	612	UniRef100_I1JIL9 Uncharacterized protein n=1 Tax=Glycine max RepID=I1JIL9_SOYBN	0	100	UniRef100_D8KWQ2 Nod-factor receptor 1A n=1 Tax=Glycine max RepID=D8KWQ2_SOYBN	0	99.84	AT3G21630.1|Symbols:CERK1, LYSM RLK1|chitin elicitor receptor kinase 1|chr3:7615543-7618530 REVERSE LENGTH=617	0	99.03	GO:0002679 GO:0002752 GO:0006468 GO:0006612 GO:0006944 GO:0009627 GO:0009697 GO:0009817 GO:0010200 GO:0010363 GO:0030968 GO:0031347 GO:0032491 GO:0032499 GO:0035556 GO:0042742 GO:0043069 GO:0045087 GO:0046777 GO:0071219 GO:0071323	cell surface pattern recognition receptor signaling pathway; cellular membrane fusion; cellular response to chitin; cellular response to molecule of bacterial origin; defense response to bacterium; defense response to fungus, incompatible interaction; detection of molecule of fungal origin; detection of peptidoglycan; endoplasmic reticulum unfolded protein response; innate immune response; intrac…	GO:0004674 GO:0005515 GO:0008061 GO:0016301 GO:0019199 GO:0042803 GO:2001080	chitin binding; chitosan binding; kinase activity; protein binding; protein homodimerization activity; protein serine/threonine kinase activity; transmembrane receptor protein kinase activity	GO:0005576 GO:0005886	extracellular region; plasma membrane	PF00069	Protein kinase domain	PTHR24420	LEUCINE-RICH REPEAT RECEPTOR-LIKE PROTEIN KINASE	KOG1187	Serine/threonine_protein_kinase
Glyma.02G270900	265	UniRef100_I1JIM0 Uncharacterized protein n=1 Tax=Glycine max RepID=I1JIM0_SOYBN	2e-80	57.3	UniRef100_B0BLB7 CM0545.450.nc protein n=1 Tax=Lotus japonicus RepID=B0BLB7_LOTJA	5e-50	61.31	AT3G50160.1|Symbols:|Plant protein of unknown function (DUF247)|chr3:18598826-18600903 REVERSE LENGTH=503	9e-20	51.89	GO:0008150	biological process	GO:0003674	molecular function	GO:0005886	plasma membrane	PF03140	Plant protein of unknown function	NA	NA	NA	NA
Glyma.02G271000	460	UniRef100_I1JIM0 Uncharacterized protein n=1 Tax=Glycine max RepID=I1JIM0_SOYBN	0	100	NA	NA	NA	AT3G50120.1|Symbols:|Plant protein of unknown function (DUF247)|chr3:18585157-18587246 REVERSE LENGTH=531	1e-98	81.73	GO:0008150	biological process	GO:0003674	molecular function	GO:0005886	plasma membrane	PF03140	Plant protein of unknown function	NA	NA	NA	NA
Glyma.02G271100	574	UniRef100_I1JIM1 Uncharacterized protein n=1 Tax=Glycine max RepID=I1JIM1_SOYBN	0	100	UniRef100_B0BLB9 CM0545.430.nc protein n=1 Tax=Lotus japonicus RepID=B0BLB9_LOTJA	0	100.35	AT4G15420.1|Symbols:|Ubiquitin fusion degradation UFD1 family protein|chr4:8823822-8825949 FORWARD LENGTH=561	0	101.96	GO:0006511	ubiquitin-dependent protein catabolic process	GO:0008270	zinc ion binding	GO:0005622 GO:0005634	intracellular; nucleus	PF03152	Ubiquitin fusion degradation protein UFD1	PTHR12555	UBIQUITIN FUSION DEGRADATON PROTEIN 1	KOG1816	Ubiquitin_fusion-degradation_protein
Glyma.02G271200	516	UniRef100_K7KB21 Uncharacterized protein n=1 Tax=Glycine max RepID=K7KB21_SOYBN	0	90.77	UniRef100_G7KHF1 Receptor-like protein kinase n=1 Tax=Medicago truncatula RepID=G7KHF1_MEDTR	0	48.33	AT2G33060.1|Symbols:AtRLP27, RLP27|receptor like protein 27|chr2:14025661-14028087 FORWARD LENGTH=808	1e-75	57.18	GO:0006952 GO:0007165	defense response; signal transduction	GO:0016301	kinase activity	GO:0005886	plasma membrane	PF00560	Leucine Rich Repeat	PTHR24420	LEUCINE-RICH REPEAT RECEPTOR-LIKE PROTEIN KINASE	KOG0472	Leucine-rich_repeat_protein
Glyma.02G271300	761	UniRef100_I1JIM3 Uncharacterized protein n=1 Tax=Glycine max RepID=I1JIM3_SOYBN	0	100	UniRef100_B0BLA8 CM0545.360.nc protein n=1 Tax=Lotus japonicus RepID=B0BLA8_LOTJA	0	100.13	AT3G21620.1|Symbols:|ERD (early-responsive to dehydration stress) family protein|chr3:7611044-7614041 REVERSE LENGTH=756	0	98.41	GO:0008150	biological process	GO:0003674	molecular function	GO:0005886 GO:0016020	membrane; plasma membrane	PF02714	Domain of unknown function DUF221	PTHR13018	PROBABLE MEMBRANE PROTEIN DUF221-RELATED	KOG1134	Uncharacterized_conserved_protein
Glyma.02G271400	155	UniRef100_C6SWT9 Uncharacterized protein n=1 Tax=Glycine max RepID=C6SWT9_SOYBN	7e-106	100	UniRef100_B0BLA9 CM0545.330.nc protein n=1 Tax=Lotus japonicus RepID=B0BLA9_LOTJA	5e-59	67.43	AT3G44020.1|Symbols:|thylakoid lumenal P17.1 protein|chr3:15801382-15802561 FORWARD LENGTH=159	2e-46	71.07	NA	NA	NA	NA	GO:0009543	chloroplast thylakoid lumen	NA	NA	NA	NA	NA	NA
Glyma.02G271500	1119	UniRef100_I1JIM7 Ubiquitin carboxyl-terminal hydrolase n=1 Tax=Glycine max RepID=I1JIM7_SOYBN	0	100	UniRef100_I1JIM7 Ubiquitin carboxyl-terminal hydrolase n=1 Tax=Glycine max RepID=I1JIM7_SOYBN	0	100	AT5G06600.1|Symbols:UBP12|ubiquitin-specific protease 12|chr5:2019545-2027834 REVERSE LENGTH=1116	0	100.18	GO:0006007 GO:0006511	glucose catabolic process; ubiquitin-dependent protein catabolic process	GO:0004221 GO:0004843	ubiquitin-specific protease activity; ubiquitin thiolesterase activity	GO:0005634 GO:0005829	cytosol; nucleus	PF00917 PF00443 PF12436	MATH domain; Ubiquitin carboxyl-terminal hydrolase; ICP0-binding domain of Ubiquitin-specific protease 7	PTHR24006	FAMILY NOT NAMED	KOG1863	Ubiquitin_carboxyl-terminal_hydrolase
Glyma.02G271600	511	UniRef100_K7KB23 Uncharacterized protein n=1 Tax=Glycine max RepID=K7KB23_SOYBN	0	100	UniRef100_G7IVN5 Pentatricopeptide repeat-containing protein n=1 Tax=Medicago truncatula RepID=G7IVN5_MEDTR	0	99.2	AT3G49730.1|Symbols:|Tetratricopeptide repeat (TPR)-like superfamily protein|chr3:18445730-18447646 REVERSE LENGTH=638	4e-61	70.85	GO:0007131 GO:0009560 GO:0009691	cytokinin biosynthetic process; embryo sac egg cell differentiation; reciprocal meiotic recombination	NA	NA	GO:0005739	mitochondrion	PF01535	PPR repeat	PTHR24015	FAMILY NOT NAMED	NA	NA
Glyma.02G271700	682	UniRef100_I1JIM9 Uncharacterized protein n=2 Tax=Glycine max RepID=I1JIM9_SOYBN	0	100	UniRef100_G7KHC0 Tousled-like kinase n=1 Tax=Medicago truncatula RepID=G7KHC0_MEDTR	0	101.49	AT5G20930.1|Symbols:TSL|Protein kinase superfamily protein|chr5:7098213-7102970 FORWARD LENGTH=688	0	98.84	GO:0006468	protein phosphorylation	GO:0004674 GO:0005515 GO:0016301 GO:0042802	identical protein binding; kinase activity; protein binding; protein serine/threonine kinase activity	GO:0005634 GO:0005737 GO:0009507	chloroplast; cytoplasm; nucleus	PF00069	Protein kinase domain	PTHR22974	MIXED LINEAGE PROTEIN KINASE	KOG0583	Serine/threonine_protein_kinase
Glyma.02G271800	286	UniRef100_I1JIN0 Uncharacterized protein n=1 Tax=Glycine max RepID=I1JIN0_SOYBN	0	100	UniRef100_Q2HS41 rRNA-processing protein UTP23-like protein n=2 Tax=Medicago truncatula RepID=Q2HS41_MEDTR	4e-161	98.62	AT2G34570.1|Symbols:MEE21|PIN domain-like family protein|chr2:14563048-14564681 REVERSE LENGTH=281	3e-90	97.15	GO:0009220 GO:0009793	embryo development ending in seed dormancy; pyrimidine ribonucleotide biosynthetic process	GO:0003674	molecular function	GO:0005634	nucleus	PF04900	Fcf1	PTHR12416	UNCHARACTERIZED	KOG3164	Uncharacterized_proteins_of_PilT_N-term./Vapc_superfamily
Glyma.02G271900	1204	UniRef100_I1JIN1 Uncharacterized protein n=1 Tax=Glycine max RepID=I1JIN1_SOYBN	0	100	UniRef100_B9HQG8 TITAN7 family protein n=1 Tax=Populus trichocarpa RepID=B9HQG8_POPTR	0	99.92	AT2G27170.2|Symbols:TTN7, SMC3|Structural maintenance of chromosomes (SMC) family protein|chr2:11609319-11617064 REVERSE LENGTH=1204	0	99.83	GO:0007059 GO:0007062 GO:0010267 GO:0035196 GO:0051607	chromosome segregation; defense response to virus; production of miRNAs involved in gene silencing by miRNA; production of ta-siRNAs involved in RNA interference; sister chromatid cohesion	GO:0003682 GO:0005524	ATP binding; chromatin binding	GO:0000785 GO:0005634 GO:0005737 GO:0005819 GO:0008278 GO:0009506 GO:0016363	chromatin; cohesin complex; cytoplasm; nuclear matrix; nucleus; plasmodesma; spindle	PF02463 PF06470	RecF/RecN/SMC N terminal domain; SMC proteins Flexible Hinge Domain	PTHR18937	STRUCTURAL MAINTENANCE OF CHROMOSOMES SMC FAMILY MEMBER	KOG0964	Structural_maintenance_of_chromosome_protein_3_(sister_chromatid_cohesion_complex_Cohesin,_subunit_SMC3)
Glyma.02G272000	122	UniRef100_I1JIN3 50S ribosomal protein L20 n=1 Tax=Glycine max RepID=I1JIN3_SOYBN	1e-82	100	UniRef100_I1JIN3 50S ribosomal protein L20 n=1 Tax=Glycine max RepID=I1JIN3_SOYBN	1e-82	100	AT1G16740.1|Symbols:|Ribosomal protein L20|chr1:5727773-5728950 FORWARD LENGTH=126	5e-73	94.44	GO:0006412 GO:0042254	ribosome biogenesis; translation	GO:0003735 GO:0019843	rRNA binding; structural constituent of ribosome	GO:0005622 GO:0005840 GO:0009507	chloroplast; intracellular; ribosome	PF00453	Ribosomal protein L20	PTHR10986	39S RIBOSOMAL PROTEIN L20	KOG4707	Mitochondrial/chloroplast_ribosomal_protein_L20
Glyma.02G272100	651	UniRef100_I1JIN5 Uncharacterized protein n=2 Tax=Glycine max RepID=I1JIN5_SOYBN	0	100	UniRef100_G7J6L9 Beta-D-glucosidase n=1 Tax=Medicago truncatula RepID=G7J6L9_MEDTR	0	100	AT5G20950.2|Symbols:|Glycosyl hydrolase family protein|chr5:7107609-7110775 REVERSE LENGTH=624	0	100.32	GO:0005975 GO:0009627 GO:0034976	carbohydrate metabolic process; response to endoplasmic reticulum stress; systemic acquired resistance	GO:0004553	hydrolase activity, hydrolyzing O-glycosyl compounds	GO:0005576 GO:0005618 GO:0009505 GO:0009506 GO:0016020	cell wall; extracellular region; membrane; plant-type cell wall; plasmodesma	PF01915 PF00933	Glycosyl hydrolase family 3 C-terminal domain; Glycosyl hydrolase family 3 N terminal domain	NA	NA	NA	NA
Glyma.02G272200	1366	UniRef100_K7KB27 Uncharacterized protein n=1 Tax=Glycine max RepID=K7KB27_SOYBN	0	100	UniRef100_G7KHF8 Aldehyde oxidase n=1 Tax=Medicago truncatula RepID=G7KHF8_MEDTR	0	100.22	AT2G27150.2|Symbols:AAO3, At-AO3, AOdelta, AtAAO3|abscisic aldehyde oxidase 3|chr2:11601952-11607014 FORWARD LENGTH=1332	0	101.58	GO:0009688 GO:0055114	abscisic acid biosynthetic process; oxidation-reduction process	GO:0003824 GO:0004031 GO:0005506 GO:0009055 GO:0010293 GO:0016491 GO:0016614 GO:0031625 GO:0046872 GO:0050302 GO:0050660 GO:0051536 GO:0051537	2 iron, 2 sulfur cluster binding; abscisic aldehyde oxidase activity; aldehyde oxidase activity; catalytic activity; electron carrier activity; flavin adenine dinucleotide binding; indole-3-acetaldehyde oxidase activity; iron-sulfur cluster binding; iron ion binding; metal ion binding; oxidoreductase activity; oxidoreductase activity, acting on CH-OH group of donors; ubiquitin protein ligase bind…	GO:0005829	cytosol	PF01799 PF00941 PF00111 PF02738 PF01315 PF03450	[2Fe-2S] binding domain; FAD binding domain in molybdopterin dehydrogenase; 2Fe-2S iron-sulfur cluster binding domain; Molybdopterin-binding domain of aldehyde dehydrogenase; Aldehyde oxidase and xanthine dehydrogenase, a/b hammerhead domain; CO dehydrogenase flavoprotein C-terminal domain	PTHR11908	XANTHINE DEHYDROGENASE	KOG0430	Xanthine_dehydrogenase
Glyma.02G272300	366	UniRef100_I1M7D9 Uncharacterized protein n=1 Tax=Glycine max RepID=I1M7D9_SOYBN	0	25.91	UniRef100_D8KXX2 AO2 n=1 Tax=Arachis hypogaea RepID=D8KXX2_ARAHY	1e-171	26.3	AT2G27150.2|Symbols:AAO3, At-AO3, AOdelta, AtAAO3|abscisic aldehyde oxidase 3|chr2:11601952-11607014 FORWARD LENGTH=1332	5e-128	26.65	GO:0009688 GO:0055114	abscisic acid biosynthetic process; oxidation-reduction process	GO:0003824 GO:0004031 GO:0005506 GO:0009055 GO:0010293 GO:0016491 GO:0016614 GO:0031625 GO:0046872 GO:0050302 GO:0050660 GO:0051536 GO:0051537	2 iron, 2 sulfur cluster binding; abscisic aldehyde oxidase activity; aldehyde oxidase activity; catalytic activity; electron carrier activity; flavin adenine dinucleotide binding; indole-3-acetaldehyde oxidase activity; iron-sulfur cluster binding; iron ion binding; metal ion binding; oxidoreductase activity; oxidoreductase activity, acting on CH-OH group of donors; ubiquitin protein ligase bind…	GO:0005829	cytosol	PF02738	Molybdopterin-binding domain of aldehyde dehydrogenase	PTHR11908	XANTHINE DEHYDROGENASE	NA	NA
Glyma.02G272400	1368	UniRef100_I1JIN7 Uncharacterized protein n=1 Tax=Glycine max RepID=I1JIN7_SOYBN	0	100	UniRef100_D8KXX2 AO2 n=1 Tax=Arachis hypogaea RepID=D8KXX2_ARAHY	0	100.96	AT3G43600.1|Symbols:AAO2, AO3, atAO-2, AOgamma, AtAO3|aldehyde oxidase 2|chr3:15512778-15517375 REVERSE LENGTH=1321	0	102.57	GO:0009688 GO:0055114	abscisic acid biosynthetic process; oxidation-reduction process	GO:0003824 GO:0004031 GO:0005506 GO:0009055 GO:0016491 GO:0016614 GO:0046872 GO:0050660 GO:0051536 GO:0051537	2 iron, 2 sulfur cluster binding; aldehyde oxidase activity; catalytic activity; electron carrier activity; flavin adenine dinucleotide binding; iron-sulfur cluster binding; iron ion binding; metal ion binding; oxidoreductase activity; oxidoreductase activity, acting on CH-OH group of donors	GO:0005829 GO:0009507	chloroplast; cytosol	PF02738 PF03450 PF01799 PF00941 PF00111 PF01315	Molybdopterin-binding domain of aldehyde dehydrogenase; CO dehydrogenase flavoprotein C-terminal domain; [2Fe-2S] binding domain; FAD binding domain in molybdopterin dehydrogenase; 2Fe-2S iron-sulfur cluster binding domain; Aldehyde oxidase and xanthine dehydrogenase, a/b hammerhead domain	PTHR11908	XANTHINE DEHYDROGENASE	KOG0430	Xanthine_dehydrogenase
Glyma.02G272500	357	UniRef100_K7KB29 Uncharacterized protein n=1 Tax=Glycine max RepID=K7KB29_SOYBN	0	100	UniRef100_B9MYM7 Heat shock family protein n=1 Tax=Populus trichocarpa RepID=B9MYM7_POPTR	2e-32	106.5	AT2G27140.1|Symbols:|HSP20-like chaperones superfamily protein|chr2:11598496-11599264 REVERSE LENGTH=224	2e-20	52.68	GO:0009408 GO:0009644 GO:0042542	response to heat; response to high light intensity; response to hydrogen peroxide	GO:0003674	molecular function	GO:0005634 GO:0016020	membrane; nucleus	PF00011	Hsp20/alpha crystallin family	PTHR11527	SMALL HEAT-SHOCK PROTEIN (HSP20) FAMILY	NA	NA
Glyma.02G272600	257	UniRef100_I1JIP0 Uncharacterized protein n=1 Tax=Glycine max RepID=I1JIP0_SOYBN	0	100	UniRef100_G7KHG5 22.0 kDa heat shock protein n=1 Tax=Medicago truncatula RepID=G7KHG5_MEDTR	2e-24	68.71	AT2G27140.1|Symbols:|HSP20-like chaperones superfamily protein|chr2:11598496-11599264 REVERSE LENGTH=224	3e-22	53.57	GO:0009408 GO:0009644 GO:0042542	response to heat; response to high light intensity; response to hydrogen peroxide	GO:0003674	molecular function	GO:0005634 GO:0016020	membrane; nucleus	NA	NA	PTHR11527	SMALL HEAT-SHOCK PROTEIN (HSP20) FAMILY	NA	NA
Glyma.02G272700	653	UniRef100_I1JIP1 Uncharacterized protein n=1 Tax=Glycine max RepID=I1JIP1_SOYBN	0	100	UniRef100_G3ECQ4 Rfls1 protein n=1 Tax=Glycine max RepID=G3ECQ4_SOYBN	0	100	AT5G20990.1|Symbols:B73, SIR4, CNX, CHL6, CNX1|molybdopterin biosynthesis CNX1 protein / molybdenum cofactor biosynthesis enzyme CNX1 (CNX1)|chr5:7128737-7133397 REVERSE LENGTH=670	0	97.01	GO:0000165 GO:0006612 GO:0006777 GO:0007154 GO:0009409 GO:0009734 GO:0009738 GO:0009862 GO:0009867 GO:0010363 GO:0030968 GO:0031348 GO:0032324 GO:0043069 GO:0050832	MAPK cascade; Mo-molybdopterin cofactor biosynthetic process; abscisic acid mediated signaling pathway; auxin mediated signaling pathway; cell communication; defense response to fungus; endoplasmic reticulum unfolded protein response; jasmonic acid mediated signaling pathway; molybdopterin cofactor biosynthetic process; negative regulation of defense response; negative regulation of programmed ce…	GO:0030151	molybdenum ion binding	GO:0005737 GO:0005829	cytoplasm; cytosol	PF00994 PF03454 PF03453	Probable molybdopterin binding domain; MoeA C-terminal region (domain IV); MoeA N-terminal region (domain I and II)	PTHR10192	MOLYBDOPTERIN BIOSYNTHESIS PROTEIN	KOG2371	Molybdopterin_biosynthesis_protein
Glyma.02G272800	397	UniRef100_K7KB30 Uncharacterized protein n=1 Tax=Glycine max RepID=K7KB30_SOYBN	0	100	UniRef100_G7KHG8 Speckle-type POZ protein n=1 Tax=Medicago truncatula RepID=G7KHG8_MEDTR	0	94.35	AT3G03740.1|Symbols:ATBPM4, BPM4|BTB-POZ and MATH domain 4|chr3:937106-939807 REVERSE LENGTH=465	0	83.23	GO:0006970 GO:0042631 GO:0071472	cellular response to salt stress; cellular response to water deprivation; response to osmotic stress	GO:0005515	protein binding	GO:0005634 GO:0005829	cytosol; nucleus	PF00917 PF00651	MATH domain; BTB/POZ domain	PTHR24411	FAMILY NOT NAMED	KOG1987	Speckle-type_POZ_protein_SPOP_and_related_proteins_with_TRAF,_MATH_and_BTB/POZ_domains
Glyma.02G272900	67	UniRef100_K7KB31 Uncharacterized protein n=1 Tax=Glycine max RepID=K7KB31_SOYBN	2e-37	100	NA	NA	NA	NA	NA	NA	NA	NA	NA	NA	NA	NA	NA	NA	NA	NA	NA	NA
Glyma.02G273000	390	UniRef100_I1JIP3 KRR1 small subunit processome component n=1 Tax=Glycine max RepID=I1JIP3_SOYBN	0	100	UniRef100_I1JIP3 KRR1 small subunit processome component n=1 Tax=Glycine max RepID=I1JIP3_SOYBN	0	100	AT5G08420.1|Symbols:|RNA-binding KH domain-containing protein|chr5:2713555-2716064 FORWARD LENGTH=391	3e-171	93.09	GO:0008150	biological process	GO:0003723	RNA binding	GO:0005634	nucleus	NA	NA	PTHR12581	HIV-1 REV BINDING PROTEIN 2, 3	KOG2874	rRNA_processing_protein
Glyma.02G273100	557	UniRef100_I1JIP4 Uncharacterized protein n=2 Tax=Glycine max RepID=I1JIP4_SOYBN	0	100	UniRef100_G7KHH3 3-hydroxy-3-methylglutaryl coenzyme A reductase n=1 Tax=Medicago truncatula RepID=G7KHH3_MEDTR	0	98.41	AT1G76490.1|Symbols:HMG1, HMGR1, AtHMGR1|hydroxy methylglutaryl CoA reductase 1|chr1:28695801-28698206 FORWARD LENGTH=642	0	86.14	GO:0006816 GO:0007030 GO:0007033 GO:0008299 GO:0009611 GO:0009651 GO:0009805 GO:0015936 GO:0016126 GO:0019287 GO:0055114 GO:0060964	Golgi organization; calcium ion transport; coenzyme A metabolic process; coumarin biosynthetic process; isopentenyl diphosphate biosynthetic process, mevalonate pathway; isoprenoid biosynthetic process; oxidation-reduction process; regulation of gene silencing by miRNA; response to salt stress; response to wounding; sterol biosynthetic process; vacuole organization	GO:0004420 GO:0005515 GO:0016616 GO:0042282 GO:0050661 GO:0050662	NADP binding; coenzyme binding; hydroxymethylglutaryl-CoA reductase (NADPH) activity; hydroxymethylglutaryl-CoA reductase activity; oxidoreductase activity, acting on the CH-OH group of donors, NAD or NADP as acceptor; protein binding	GO:0005783 GO:0005789 GO:0016020 GO:0016021	endoplasmic reticulum; endoplasmic reticulum membrane; integral to membrane; membrane	PF00368	Hydroxymethylglutaryl-coenzyme A reductase	PTHR10572	3-HYDROXY-3-METHYLGLUTARYL-COENZYME A REDUCTASE	KOG2480	3-hydroxy-3-methylglutaryl-CoA_(HMG-CoA)_reductase
Glyma.02G273200	561	UniRef100_I1JIP5 Uncharacterized protein n=1 Tax=Glycine max RepID=I1JIP5_SOYBN	0	100	UniRef100_G7K2W1 T-complex protein 1 subunit eta n=1 Tax=Medicago truncatula RepID=G7K2W1_MEDTR	0	96.61	AT3G11830.1|Symbols:|TCP-1/cpn60 chaperonin family protein|chr3:3732734-3736156 FORWARD LENGTH=557	0	96.41	GO:0006094 GO:0006096 GO:0006457 GO:0009651 GO:0009664 GO:0042545 GO:0044267 GO:0046686	cell wall modification; cellular protein metabolic process; gluconeogenesis; glycolysis; plant-type cell wall organization; protein folding; response to cadmium ion; response to salt stress	GO:0005524 GO:0051082	ATP binding; unfolded protein binding	GO:0005829	cytosol	PF00118	TCP-1/cpn60 chaperonin family	PTHR11353	CHAPERONIN	KOG0361	Chaperonin_complex_component,_TCP-1_eta_subunit_(CCT7)
Glyma.02G273300	310	UniRef100_C6TKZ4 Uncharacterized protein n=1 Tax=Glycine max RepID=C6TKZ4_SOYBN	0	100	UniRef100_B7FIH8 Trans-2,3-enoyl-CoA reductase n=1 Tax=Medicago truncatula RepID=B7FIH8_MEDTR	0	99.68	AT3G55360.1|Symbols:CER10, ECR, ATTSC13, TSC13|3-oxo-5-alpha-steroid 4-dehydrogenase family protein|chr3:20521186-20522856 REVERSE LENGTH=310	0	99.68	GO:0006629 GO:0006665 GO:0006816 GO:0007030 GO:0009651 GO:0010025 GO:0016126 GO:0046520	Golgi organization; calcium ion transport; lipid metabolic process; response to salt stress; sphingoid biosynthetic process; sphingolipid metabolic process; sterol biosynthetic process; wax biosynthetic process	GO:0003865 GO:0009922 GO:0016627 GO:0019166	3-oxo-5-alpha-steroid 4-dehydrogenase activity; fatty acid elongase activity; oxidoreductase activity, acting on the CH-CH group of donors; trans-2-enoyl-CoA reductase (NADPH) activity	GO:0005737 GO:0005783 GO:0005789 GO:0005886 GO:0009923 GO:0016021	cytoplasm; endoplasmic reticulum; endoplasmic reticulum membrane; fatty acid elongase complex; integral to membrane; plasma membrane	PF02544	3-oxo-5-alpha-steroid 4-dehydrogenase	PTHR10556	3-OXO-5-ALPHA-STEROID 4-DEHYDROGENASE	KOG1639	Steroid_reductase_required_for_elongation_of_the_very_long_chain_fatty_acids
Glyma.02G273400	509	UniRef100_I1JIP8 Uncharacterized protein n=2 Tax=Glycine max RepID=I1JIP8_SOYBN	0	100	UniRef100_G7K2W6 UDP-glucuronosyltransferase 1-7C n=1 Tax=Medicago truncatula RepID=G7K2W6_MEDTR	0	96.98	AT5G12890.1|Symbols:|UDP-Glycosyltransferase superfamily protein|chr5:4069658-4071124 REVERSE LENGTH=488	1e-137	96.72	GO:0008152	metabolic process	GO:0008194 GO:0016757 GO:0016758	UDP-glycosyltransferase activity; transferase activity, transferring glycosyl groups; transferase activity, transferring hexosyl groups	NA	NA	PF00201	UDP-glucoronosyl and UDP-glucosyl transferase	PTHR11926	GLUCOSYL/GLUCURONOSYL TRANSFERASES	KOG1192	UDP-glucuronosyl_and_UDP-glucosyl_transferase
Glyma.02G273500	880	UniRef100_I1JIP9 Uncharacterized protein n=1 Tax=Glycine max RepID=I1JIP9_SOYBN	0	100	UniRef100_E4MXS3 mRNA, clone: RTFL01-24-K11 n=2 Tax=Eutrema RepID=E4MXS3_THEHA	0	102.11	AT2G27110.2|Symbols:FRS3|FAR1-related sequence 3|chr2:11576969-11580405 REVERSE LENGTH=851	0	102.23	GO:0006635 GO:0009639 GO:0016558	fatty acid beta-oxidation; protein import into peroxisome matrix; response to red or far red light	GO:0008270	zinc ion binding	GO:0005634 GO:0009506	nucleus; plasmodesma	PF03101 PF04434 PF10551	FAR1 DNA-binding domain; SWIM zinc finger; MULE transposase domain	NA	NA	NA	NA
Glyma.02G273600	344	UniRef100_I1JIQ0 Uncharacterized protein n=1 Tax=Glycine max RepID=I1JIQ0_SOYBN	0	100	UniRef100_G7K2W9 Hyccin n=1 Tax=Medicago truncatula RepID=G7K2W9_MEDTR	1e-152	94.03	AT5G21050.1|Symbols:|LOCATED IN: chloroplast; EXPRESSED IN: 14 plant structures; EXPRESSED DURING: 8 growth stages; CONTAINS InterPro DOMAIN/s: Hyccin (InterPro:IPR018619); BEST Arabidopsis thaliana protein match is: unknown protein (TAIR:AT5G64090.1); Has 206 Blast hits to 206 proteins in 60 species: Archae - 0; Bacteria - 0; Metazoa - 145; Fungi - 0; Plants - 50; Viruses - 0; Other Eukaryotes -…	1e-130	96.62	NA	NA	NA	NA	GO:0005634	nucleus	PF09790	Hyccin	PTHR24882	No Available Panther Description	KOG4688	Putative_beta-catenin-Tcf/Lef_signaling_pathway_component_DRCTNNB1A
Glyma.02G273700	571	UniRef100_I1JIQ1 Uncharacterized protein n=1 Tax=Glycine max RepID=I1JIQ1_SOYBN	0	100	UniRef100_G7K2X0 F-box/WD-40 repeat-containing protein n=1 Tax=Medicago truncatula RepID=G7K2X0_MEDTR	0	99.13	AT5G21040.2|Symbols:FBX2|F-box protein 2|chr5:7145058-7146677 REVERSE LENGTH=539	0	93.51	GO:0016036	cellular response to phosphate starvation	GO:0003674	molecular function	GO:0005737 GO:0019005	SCF ubiquitin ligase complex; cytoplasm	PF00400 PF00646	WD domain, G-beta repeat; F-box domain	PTHR22844	F-BOX AND WD40 DOMAIN PROTEIN	KOG0281	Beta-TrCP_(transducin_repeats_containing)/Slimb_proteins
Glyma.02G273800	449	UniRef100_K7KB36 Uncharacterized protein n=1 Tax=Glycine max RepID=K7KB36_SOYBN	0	100	UniRef100_G7K2X2 Geranylgeranyl reductase n=1 Tax=Medicago truncatula RepID=G7K2X2_MEDTR	0	99.56	AT1G74470.1|Symbols:|Pyridine nucleotide-disulphide oxidoreductase family protein|chr1:27991248-27992845 FORWARD LENGTH=467	0	94.43	GO:0008152 GO:0015979 GO:0015995 GO:0019344 GO:0019684 GO:0035304 GO:0051188 GO:0055114	chlorophyll biosynthetic process; cofactor biosynthetic process; cysteine biosynthetic process; metabolic process; oxidation-reduction process; photosynthesis; photosynthesis, light reaction; regulation of protein dephosphorylation	GO:0005515 GO:0016491 GO:0016628 GO:0045550	geranylgeranyl reductase activity; oxidoreductase activity; oxidoreductase activity, acting on the CH-CH group of donors, NAD or NADP as acceptor; protein binding	GO:0009507 GO:0009534 GO:0009535 GO:0009941 GO:0016020	chloroplast; chloroplast envelope; chloroplast thylakoid; chloroplast thylakoid membrane; membrane	PF01494	FAD binding domain	PTHR10617	ELECTRON TRANSFER FLAVOPROTEIN-UBIQUINONE OXIDOREDUCTASE	NA	NA
Glyma.02G273900	378	UniRef100_UPI0002336BDE PREDICTED: GDSL esterase/lipase At1g71250-like n=1 Tax=Glycine max RepID=UPI0002336BDE	0	100	UniRef100_G7K2X1 GDSL esterase/lipase n=1 Tax=Medicago truncatula RepID=G7K2X1_MEDTR	0	98.68	AT4G10950.1|Symbols:|SGNH hydrolase-type esterase superfamily protein|chr4:6711502-6713512 REVERSE LENGTH=400	2e-60	83.25	GO:0006629	lipid metabolic process	GO:0004091 GO:0016788	carboxylesterase activity; hydrolase activity, acting on ester bonds	GO:0005576	extracellular region	PF00657	GDSL-like Lipase/Acylhydrolase	PTHR22835	ZINC FINGER FYVE DOMAIN CONTAINING PROTEIN	NA	NA
Glyma.02G274000	387	UniRef100_UPI0001890AF6 PREDICTED: alcohol dehydrogenase-like 7-like n=1 Tax=Glycine max RepID=UPI0001890AF6	0	100	UniRef100_G7J607 Alcohol dehydrogenase-like protein n=1 Tax=Medicago truncatula RepID=G7J607_MEDTR	0	97.93	AT5G42250.1|Symbols:|Zinc-binding alcohol dehydrogenase family protein|chr5:16894087-16897450 FORWARD LENGTH=390	0	95.9	GO:0055114	oxidation-reduction process	GO:0000166 GO:0008270 GO:0016491	nucleotide binding; oxidoreductase activity; zinc ion binding	GO:0005737	cytoplasm	PF00107 PF08240	Zinc-binding dehydrogenase; Alcohol dehydrogenase GroES-like domain	PTHR11695	ALCOHOL DEHYDROGENASE RELATED	KOG0022	Alcohol_dehydrogenase,_class_III
Glyma.02G274100	388	UniRef100_I1JIQ4 Uncharacterized protein n=1 Tax=Glycine max RepID=I1JIQ4_SOYBN	0	100	UniRef100_G7J607 Alcohol dehydrogenase-like protein n=1 Tax=Medicago truncatula RepID=G7J607_MEDTR	0	97.93	AT5G42250.1|Symbols:|Zinc-binding alcohol dehydrogenase family protein|chr5:16894087-16897450 FORWARD LENGTH=390	0	95.9	GO:0055114	oxidation-reduction process	GO:0000166 GO:0008270 GO:0016491	nucleotide binding; oxidoreductase activity; zinc ion binding	GO:0005737	cytoplasm	PF00107 PF08240	Zinc-binding dehydrogenase; Alcohol dehydrogenase GroES-like domain	PTHR11695	ALCOHOL DEHYDROGENASE RELATED	KOG0022	Alcohol_dehydrogenase,_class_III
Glyma.02G274200	227	UniRef100_C6TMZ2 Uncharacterized protein n=1 Tax=Glycine max RepID=C6TMZ2_SOYBN	2e-156	100	UniRef100_Q0KIW0 Glycosyl hydrolases family 17 protein n=1 Tax=Solanum demissum RepID=Q0KIW0_SOLDE	6e-85	23.74	AT5G21070.1|Symbols:|unknown protein; Has 115 Blast hits to 115 proteins in 34 species: Archae - 1; Bacteria - 36; Metazoa - 0; Fungi - 0; Plants - 60; Viruses - 0; Other Eukaryotes - 18 (source: NCBI BLink).|chr5:7156356-7157490 FORWARD LENGTH=225	4e-140	100.44	GO:0008150	biological process	GO:0003674	molecular function	GO:0005575	cellular component	NA	NA	NA	NA	NA	NA
Glyma.02G274300	784	UniRef100_I1JIQ6 Uncharacterized protein n=1 Tax=Glycine max RepID=I1JIQ6_SOYBN	0	100	UniRef100_Q0GPD1 BZIP transcription factor bZIP114 (Fragment) n=1 Tax=Glycine max RepID=Q0GPD1_SOYBN	0	100	AT2G27090.1|Symbols:|Protein of unknown function (DUF630 and DUF632)|chr2:11567691-11570345 REVERSE LENGTH=743	0	101.62	GO:0006486 GO:0006499 GO:0006635 GO:0016558	N-terminal protein myristoylation; fatty acid beta-oxidation; protein glycosylation; protein import into peroxisome matrix	NA	NA	GO:0005634 GO:0005886 GO:0009506	nucleus; plasma membrane; plasmodesma	PF04782 PF04783	Protein of unknown function (DUF632); Protein of unknown function (DUF630)	PTHR21450	UNCHARACTERIZED	NA	NA
Glyma.02G274400	274	UniRef100_I1JIQ7 Uncharacterized protein n=1 Tax=Glycine max RepID=I1JIQ7_SOYBN	0	100	UniRef100_G7K2X8 Avr9/Cf-9 rapidly elicited protein n=1 Tax=Medicago truncatula RepID=G7K2X8_MEDTR	3e-125	107.06	AT2G27080.2|Symbols:|Late embryogenesis abundant (LEA) hydroxyproline-rich glycoprotein family|chr2:11566383-11567165 FORWARD LENGTH=260	2e-95	105	GO:0008150	biological process	GO:0003674	molecular function	GO:0005886 GO:0009506	plasma membrane; plasmodesma	PF03168	Late embryogenesis abundant protein	NA	NA	NA	NA
Glyma.02G274500	1009	UniRef100_UPI0003DECAF0 PREDICTED: probable inactive receptor kinase At5g10020-like isoform X5 n=1 Tax=Glycine max RepID=UPI0003DECAF0	0	99.02	UniRef100_G7K2X9 Receptor-like protein kinase BRI1-like protein n=1 Tax=Medicago truncatula RepID=G7K2X9_MEDTR	0	98.04	AT2G27060.1|Symbols:|Leucine-rich repeat protein kinase family protein|chr2:11551288-11554577 FORWARD LENGTH=1020	0	98.24	GO:0006468 GO:0007169	protein phosphorylation; transmembrane receptor protein tyrosine kinase signaling pathway	GO:0004672 GO:0004674 GO:0004713 GO:0005524 GO:0016772	ATP binding; protein kinase activity; protein serine/threonine kinase activity; protein tyrosine kinase activity; transferase activity, transferring phosphorus-containing groups	GO:0005886	plasma membrane	PF08263 PF07714 PF00560	Leucine rich repeat N-terminal domain; Protein tyrosine kinase; Leucine Rich Repeat	PTHR24420	LEUCINE-RICH REPEAT RECEPTOR-LIKE PROTEIN KINASE	KOG1187	Serine/threonine_protein_kinase
Glyma.02G274600	615	UniRef100_UPI00018C6C24 PREDICTED: protein ETHYLENE INSENSITIVE 3 n=1 Tax=Glycine max RepID=UPI00018C6C24	0	100	UniRef100_Q8SA69 Transcription factor EIL1 n=1 Tax=Vigna radiata RepID=Q8SA69_VIGRA	0	100.82	AT3G20770.1|Symbols:EIN3, AtEIN3|Ethylene insensitive 3 family protein|chr3:7260702-7262588 REVERSE LENGTH=628	0	97.45	GO:0000303 GO:0006355 GO:0006487 GO:0007165 GO:0008219 GO:0009639 GO:0009651 GO:0009723 GO:0009733 GO:0009737 GO:0009743 GO:0009751 GO:0009755 GO:0009863 GO:0009873 GO:0010182 GO:0042742 GO:0048825 GO:0071281	cell death; cellular response to iron ion; cotyledon development; defense response to bacterium; ethylene mediated signaling pathway; hormone-mediated signaling pathway; protein N-linked glycosylation; regulation of transcription, DNA-dependent; response to abscisic acid stimulus; response to auxin stimulus; response to carbohydrate stimulus; response to ethylene stimulus; response to red or far …	GO:0003677 GO:0003700 GO:0005515	DNA binding; protein binding; sequence-specific DNA binding transcription factor activity	GO:0005634	nucleus	PF04873	Ethylene insensitive 3	NA	NA	NA	NA
Glyma.02G274700	171	UniRef100_UPI0003DECBD0 PREDICTED: AP-1 complex subunit sigma-2-like isoform X1 n=1 Tax=Glycine max RepID=UPI0003DECBD0	2e-121	100	UniRef100_G7K2Y3 AP-1 complex subunit sigma-2 n=1 Tax=Medicago truncatula RepID=G7K2Y3_MEDTR	5e-107	90.27	AT4G35410.2|Symbols:|Clathrin adaptor complex small chain family protein|chr4:16832572-16833796 FORWARD LENGTH=162	1e-96	98.15	GO:0006810 GO:0006886 GO:0015031 GO:0016192 GO:0030244 GO:0048193	Golgi vesicle transport; cellulose biosynthetic process; intracellular protein transport; protein transport; transport; vesicle-mediated transport	GO:0008565	protein transporter activity	GO:0005622 GO:0005794 GO:0030125	Golgi apparatus; clathrin vesicle coat; intracellular	PF01217	Clathrin adaptor complex small chain	PTHR11753	CLATHRIN COAT ASSEMBLY PROTEIN	KOG0934	Clathrin_adaptor_complex,_small_subunit
Glyma.02G274800	219	UniRef100_I1JIR0 Uncharacterized protein n=1 Tax=Glycine max RepID=I1JIR0_SOYBN	2e-152	100	UniRef100_C6ZRZ5 Leucine-rich repeat protein n=1 Tax=Glycine max RepID=C6ZRZ5_SOYBN	7e-150	100	AT5G21090.1|Symbols:|Leucine-rich repeat (LRR) family protein|chr5:7164758-7166904 FORWARD LENGTH=218	2e-126	95.41	GO:0006096 GO:0006833 GO:0006972 GO:0007030 GO:0007165 GO:0009266 GO:0009627 GO:0009651 GO:0034976 GO:0042744 GO:0046686	Golgi organization; glycolysis; hydrogen peroxide catabolic process; hyperosmotic response; response to cadmium ion; response to endoplasmic reticulum stress; response to salt stress; response to temperature stimulus; signal transduction; systemic acquired resistance; water transport	NA	NA	GO:0005886	plasma membrane	PF00560 PF08263	Leucine Rich Repeat; Leucine rich repeat N-terminal domain	PTHR24420	LEUCINE-RICH REPEAT RECEPTOR-LIKE PROTEIN KINASE	NA	NA
Glyma.02G274900	907	UniRef100_I1JIR2 Uncharacterized protein n=1 Tax=Glycine max RepID=I1JIR2_SOYBN	0	100	UniRef100_G7K2Y8 Protein argonaute 4 n=2 Tax=Medicago truncatula RepID=G7K2Y8_MEDTR	0	94.51	AT2G27040.2|Symbols:AGO4|Argonaute family protein|chr2:11536795-11541503 REVERSE LENGTH=924	0	95.02	GO:0000023 GO:0000226 GO:0000278 GO:0000724 GO:0000911 GO:0006260 GO:0006261 GO:0006275 GO:0006306 GO:0006342 GO:0006346 GO:0007267 GO:0008283 GO:0009555 GO:0009616 GO:0009816 GO:0009855 GO:0009909 GO:0009965 GO:0010014 GO:0010073 GO:0010267 GO:0016246 GO:0016444 GO:0016458 GO:0016568 GO:0016569 GO:0016570 GO:0016572 GO:0019252 GO:0030422 GO:0031047 GO:0031048 GO:0034968 GO:0035196 GO:0043085 GO:…	DNA-dependent DNA replication; DNA methylation; DNA replication; RNA interference; cell-cell signaling; cell proliferation; chromatin modification; chromatin silencing; chromatin silencing by small RNA; covalent chromatin modification; cytokinesis by cell plate formation; defense response to bacterium, incompatible interaction; determination of bilateral symmetry; double-strand break repair via h…	GO:0005515 GO:0035197	protein binding; siRNA binding	GO:0005634 GO:0005719 GO:0005730 GO:0015030	Cajal body; nuclear euchromatin; nucleolus; nucleus	PF02171 PF02170 PF08699	Piwi domain; PAZ domain; Domain of unknown function (DUF1785)	PTHR22891	EUKARYOTIC TRANSLATION INITIATION FACTOR 2C	KOG1041	Translation_initiation_factor_2C_(eIF-2C)_and_related_proteins
Glyma.02G275000	172	UniRef100_K7KB43 Uncharacterized protein n=2 Tax=Glycine max RepID=K7KB43_SOYBN	3e-124	100	UniRef100_G7K300 Hydroxyacyl-thioester dehydratase type 2 n=1 Tax=Medicago truncatula RepID=G7K300_MEDTR	3e-85	99.39	AT5G60335.1|Symbols:|Thioesterase superfamily protein|chr5:24273879-24274551 REVERSE LENGTH=166	1e-58	87.35	GO:0008152	metabolic process	GO:0016491	oxidoreductase activity	GO:0009507	chloroplast	PF01575	MaoC like domain	PTHR13078	FAMILY NOT NAMED	NA	NA
Glyma.02G275100	180	UniRef100_UPI0003DE9773 PREDICTED: lamin-like protein-like n=1 Tax=Glycine max RepID=UPI0003DE9773	3e-122	104.07	UniRef100_G7K304 Early nodulin-like protein n=1 Tax=Medicago truncatula RepID=G7K304_MEDTR	6e-53	48.33	AT2G27035.1|Symbols:ENODL20, AtENODL20|early nodulin-like protein 20|chr2:11535670-11536251 FORWARD LENGTH=163	1e-36	89.57	NA	NA	GO:0005507 GO:0009055	copper ion binding; electron carrier activity	GO:0005886	plasma membrane	PF02298	Plastocyanin-like domain	NA	NA	NA	NA
Glyma.02G275200	198	UniRef100_K7KB46 Uncharacterized protein n=1 Tax=Glycine max RepID=K7KB46_SOYBN	2e-144	100	UniRef100_G7K304 Early nodulin-like protein n=1 Tax=Medicago truncatula RepID=G7K304_MEDTR	3e-51	47	AT2G27035.1|Symbols:ENODL20, AtENODL20|early nodulin-like protein 20|chr2:11535670-11536251 FORWARD LENGTH=163	4e-38	90.8	NA	NA	GO:0005507 GO:0009055	copper ion binding; electron carrier activity	GO:0005886	plasma membrane	PF02298	Plastocyanin-like domain	NA	NA	NA	NA
Glyma.02G275300	937	UniRef100_I1JIR6 Uncharacterized protein n=1 Tax=Glycine max RepID=I1JIR6_SOYBN	0	100	UniRef100_F4K703 LA RNA-binding protein n=1 Tax=Arabidopsis thaliana RepID=F4K703_ARATH	0	111.3	AT5G21160.2|Symbols:|LA RNA-binding protein|chr5:7198817-7203879 REVERSE LENGTH=832	0	111.3	GO:0008150	biological process	GO:0003674	molecular function	GO:0005634 GO:0005737 GO:0005829	cytoplasm; cytosol; nucleus	PF05383	La domain	PTHR22792	LUPUS LA PROTEIN-RELATED	KOG2590	RNA-binding_protein_LARP/SRO9_and_related_La_domain_proteins
Glyma.02G275400	497	UniRef100_I1JIR8 Uncharacterized protein n=1 Tax=Glycine max RepID=I1JIR8_SOYBN	0	100	UniRef100_G7K7P5 Heterogeneous nuclear ribonucleoprotein D0 n=1 Tax=Medicago truncatula RepID=G7K7P5_MEDTR	2e-167	94.07	AT2G41060.2|Symbols:|RNA-binding (RRM/RBD/RNP motifs) family protein|chr2:17127138-17128493 FORWARD LENGTH=451	4e-129	109.31	GO:0006952 GO:0008219 GO:0009693 GO:0010150	cell death; defense response; ethylene biosynthetic process; leaf senescence	GO:0000166 GO:0003676 GO:0003723	RNA binding; nucleic acid binding; nucleotide binding	GO:0005634 GO:0005737	cytoplasm; nucleus	PF00076	RNA recognition motif. (a.k.a. RRM, RBD, or RNP domain)	PTHR24011	FAMILY NOT NAMED	KOG4205	RNA-binding_protein_musashi/mRNA_cleavage_and_polyadenylation_factor_I_complex,_subunit_HRP1
Glyma.02G275500	284	UniRef100_UPI0001B6414B PREDICTED: SNF1-related protein kinase regulatory subunit beta-1 n=1 Tax=Glycine max RepID=UPI0001B6414B	0	99.65	UniRef100_Q7XYX8 AKIN beta1 n=1 Tax=Medicago truncatula RepID=Q7XYX8_MEDTR	7e-173	102.54	AT5G21170.1|Symbols:AKINBETA1|5'-AMP-activated protein kinase beta-2 subunit protein|chr5:7205718-7208239 FORWARD LENGTH=283	6e-111	100	GO:0006499 GO:0009744 GO:0009750 GO:0043562	N-terminal protein myristoylation; cellular response to nitrogen levels; response to fructose stimulus; response to sucrose stimulus	GO:0004679 GO:0005515	AMP-activated protein kinase activity; protein binding	GO:0005737	cytoplasm	PF04739	5'-AMP-activated protein kinase beta subunit, interation domain	PTHR10343	5'-AMP-ACTIVATED PROTEIN KINASE , BETA SUBUNIT	KOG1616	Protein_involved_in_Snf1_protein_kinase_complex_assembly
Glyma.02G275600	150	UniRef100_G3MHB1 Putative uncharacterized protein (Fragment) n=1 Tax=Amblyomma maculatum RepID=G3MHB1_9ACAR	5e-102	84.66	UniRef100_P17928 Calmodulin n=7 Tax=Magnoliophyta RepID=CALM_MEDSA	8e-102	100	AT3G43810.1|Symbols:CAM7|calmodulin 7|chr3:15664619-15666355 REVERSE LENGTH=149	3e-104	100	GO:0005513 GO:0006084 GO:0009612 GO:0010099 GO:0019722 GO:0019932	acetyl-CoA metabolic process; calcium-mediated signaling; detection of calcium ion; regulation of photomorphogenesis; response to mechanical stimulus; second-messenger-mediated signaling	GO:0005509 GO:0005515	calcium ion binding; protein binding	GO:0005737	cytoplasm	PF00036	EF hand	PTHR23050	CALCIUM BINDING PROTEIN	KOG0027	Calmodulin_and_related_proteins_(EF-Hand_superfamily)
Glyma.02G275700	242	UniRef100_I1JIS3 Uncharacterized protein n=1 Tax=Glycine max RepID=I1JIS3_SOYBN	5e-177	100	UniRef100_G7K7Q6 Oligoribonuclease n=1 Tax=Medicago truncatula RepID=G7K7Q6_MEDTR	5e-111	15.41	AT2G26970.2|Symbols:|Polynucleotidyl transferase, ribonuclease H-like superfamily protein|chr2:11509908-11511903 REVERSE LENGTH=218	5e-101	109.17	NA	NA	GO:0003676 GO:0004527	exonuclease activity; nucleic acid binding	GO:0005622	intracellular	PF00929	Exonuclease	PTHR11046	OLIGORIBONUCLEASE, MITOCHONDRIAL	KOG3242	Oligoribonuclease_(3'-&gt;5'_exoribonuclease)
Glyma.02G275800	189	UniRef100_K7KB50 Uncharacterized protein n=1 Tax=Glycine max RepID=K7KB50_SOYBN	4e-136	100	UniRef100_G7K7Q7 ABC-type transport system involved in resistance to organic solvents periplasmic component n=1 Tax=Medicago truncatula RepID=G7K7Q7_MEDTR	4e-64	37.69	AT3G20320.2|Symbols:TGD2|trigalactosyldiacylglycerol2|chr3:7088589-7089640 REVERSE LENGTH=282	7e-59	53.19	GO:0006869 GO:0010207 GO:0032365	intracellular lipid transport; lipid transport; photosystem II assembly	GO:0005319 GO:0005543	lipid transporter activity; phospholipid binding	GO:0009507 GO:0009536 GO:0009706 GO:0009941 GO:0016020	chloroplast; chloroplast envelope; chloroplast inner membrane; membrane; plastid	PF02470	mce related protein	NA	NA	NA	NA
Glyma.02G275900	473	UniRef100_I1JIS5 Uncharacterized protein n=1 Tax=Glycine max RepID=I1JIS5_SOYBN	0	100	UniRef100_A7BJ79 CBL-interacting protein kinase n=1 Tax=Vigna unguiculata RepID=A7BJ79_VIGUN	0	95.92	AT2G26980.3|Symbols:CIPK3|CBL-interacting protein kinase 3|chr2:11515234-11518205 REVERSE LENGTH=441	0	95.01	GO:0006468 GO:0007165 GO:0009735 GO:0009737 GO:0009738 GO:0009845	abscisic acid mediated signaling pathway; protein phosphorylation; response to abscisic acid stimulus; response to cytokinin stimulus; seed germination; signal transduction	GO:0004672 GO:0004674 GO:0004713 GO:0005524 GO:0016301 GO:0016772	ATP binding; kinase activity; protein kinase activity; protein serine/threonine kinase activity; protein tyrosine kinase activity; transferase activity, transferring phosphorus-containing groups	GO:0005634 GO:0005737 GO:0005886	cytoplasm; nucleus; plasma membrane	PF00069 PF03822	Protein kinase domain; NAF domain	PTHR24345	SERINE/THREONINE-PROTEIN KINASE PLK	KOG0583	Serine/threonine_protein_kinase
Glyma.02G276000	517	UniRef100_I1JIS7 Uncharacterized protein n=1 Tax=Glycine max RepID=I1JIS7_SOYBN	0	100	UniRef100_B9HDG3 Cdc2 family protein n=1 Tax=Populus trichocarpa RepID=B9HDG3_POPTR	0	100.58	AT5G10270.1|Symbols:CDKC;1|cyclin-dependent kinase C;1|chr5:3221715-3224674 REVERSE LENGTH=505	0	102.18	GO:0006468 GO:0009615 GO:0010228 GO:0048366	leaf development; protein phosphorylation; response to virus; vegetative to reproductive phase transition of meristem	GO:0004672 GO:0004674 GO:0005515 GO:0005524 GO:0016301 GO:0016772	ATP binding; kinase activity; protein binding; protein kinase activity; protein serine/threonine kinase activity; transferase activity, transferring phosphorus-containing groups	GO:0005634 GO:0005829	cytosol; nucleus	PF00069	Protein kinase domain	PTHR24056	CELL DIVISION PROTEIN KINASE	KOG0600	Cdc2-related_protein_kinase
Glyma.02G276100	108	UniRef100_K7KB51 Uncharacterized protein n=1 Tax=Glycine max RepID=K7KB51_SOYBN	3e-72	100	NA	NA	NA	AT5G35732.1|Symbols:|unknown protein; BEST Arabidopsis thaliana protein match is: unknown protein (TAIR:AT2G04795.1); Has 35333 Blast hits to 34131 proteins in 2444 species: Archae - 798; Bacteria - 22429; Metazoa - 974; Fungi - 991; Plants - 531; Viruses - 0; Other Eukaryotes - 9610 (source: NCBI BLink).|chr5:13897961-13898263 FORWARD LENGTH=100	7e-21	107	GO:0008150	biological process	GO:0003674	molecular function	GO:0005634	nucleus	NA	NA	NA	NA	NA	NA
Glyma.02G276200	873	UniRef100_I1JIS9 Uncharacterized protein n=1 Tax=Glycine max RepID=I1JIS9_SOYBN	0	100	UniRef100_G7K7S1 Pentatricopeptide repeat-containing protein n=1 Tax=Medicago truncatula RepID=G7K7S1_MEDTR	0	82.72	AT1G71210.1|Symbols:|Pentatricopeptide repeat (PPR) superfamily protein|chr1:26838850-26841489 REVERSE LENGTH=879	0	92.15	GO:0008150	biological process	NA	NA	GO:0005739	mitochondrion	PF01535	PPR repeat	PTHR24015	FAMILY NOT NAMED	NA	NA
Glyma.02G276300	140	UniRef100_K7KB52 Uncharacterized protein n=1 Tax=Glycine max RepID=K7KB52_SOYBN	3e-98	100	UniRef100_G7K7S6 Urease accessory protein UreF n=1 Tax=Medicago truncatula RepID=G7K7S6_MEDTR	3e-42	23.54	AT3G17668.1|Symbols:ENA|DnaJ/Hsp40 cysteine-rich domain superfamily protein|chr3:6039640-6040324 FORWARD LENGTH=135	9e-48	85.93	NA	NA	GO:0031072 GO:0051082	heat shock protein binding; unfolded protein binding	GO:0005634	nucleus	NA	NA	NA	NA	NA	NA
Glyma.02G276400	239	UniRef100_K7KB53 Uncharacterized protein n=1 Tax=Glycine max RepID=K7KB53_SOYBN	2e-175	100	UniRef100_Q8H1P4 Urease accessory protein UreF n=1 Tax=Glycine max RepID=Q8H1P4_SOYBN	2e-163	99.17	AT1G21840.1|Symbols:UREF|urease accessory protein F|chr1:7666859-7667581 FORWARD LENGTH=240	1e-118	92.92	GO:0006661 GO:0006807 GO:0048554	nitrogen compound metabolic process; phosphatidylinositol biosynthetic process; positive regulation of metalloenzyme activity	GO:0016151	nickel cation binding	GO:0005737	cytoplasm	PF01730	UreF	NA	NA	NA	NA
Glyma.02G276500	274	UniRef100_K7KB54 Uncharacterized protein n=1 Tax=Glycine max RepID=K7KB54_SOYBN	0	87.38	NA	NA	NA	NA	NA	NA	NA	NA	NA	NA	NA	NA	NA	NA	NA	NA	NA	NA
Glyma.02G276600	224	UniRef100_C6T034 Uncharacterized protein n=1 Tax=Glycine max RepID=C6T034_SOYBN	4e-159	100	UniRef100_T2DP50 Elongation factor 1-beta n=1 Tax=Phaseolus vulgaris RepID=T2DP50_PHAVU	2e-122	100	AT5G12110.1|Symbols:|Glutathione S-transferase, C-terminal-like;Translation elongation factor EF1B/ribosomal protein S6|chr5:3914483-3915732 FORWARD LENGTH=228	9e-107	97.81	GO:0006414 GO:0009407 GO:0010583	response to cyclopentenone; toxin catabolic process; translational elongation	GO:0003746	translation elongation factor activity	GO:0005853 GO:0005886	eukaryotic translation elongation factor 1 complex; plasma membrane	PF00736	EF-1 guanine nucleotide exchange domain	PTHR11595	ELONGATION FACTOR 1-BETA	KOG1668	Elongation_factor_1_beta/delta_chain
Glyma.02G276700	372	UniRef100_K7KB55 Uncharacterized protein n=2 Tax=Glycine max RepID=K7KB55_SOYBN	0	100	UniRef100_B9HDT7 Zinc finger family protein n=1 Tax=Populus trichocarpa RepID=B9HDT7_POPTR	5e-96	103.25	AT2G40830.3|Symbols:RHC1A|RING-H2 finger C1A|chr2:17043642-17044628 FORWARD LENGTH=328	2e-75	97.26	NA	NA	GO:0008270	zinc ion binding	GO:0005618	cell wall	PF00097	Zinc finger, C3HC4 type (RING finger)	PTHR22763	RING ZINC FINGER PROTEIN	NA	NA
Glyma.02G276800	651	UniRef100_I1JIT7 Uncharacterized protein n=1 Tax=Glycine max RepID=I1JIT7_SOYBN	0	100	UniRef100_B9HPT6 Ubiquitin-associated domain-containing family protein n=1 Tax=Populus trichocarpa RepID=B9HPT6_POPTR	0	96.34	AT2G26920.1|Symbols:|Ubiquitin-associated/translation elongation factor EF1B protein|chr2:11489648-11491588 FORWARD LENGTH=646	4e-169	100.62	GO:0000956 GO:0008150	biological process; nuclear-transcribed mRNA catabolic process	GO:0003674	molecular function	GO:0005634	nucleus	PF00627	UBA/TS-N domain	NA	NA	NA	NA
Glyma.02G276900	182	UniRef100_C6THB5 Uncharacterized protein n=2 Tax=Glycine max RepID=C6THB5_SOYBN	5e-127	100	UniRef100_G7KEY2 Phosphopantetheine adenylyltransferase n=1 Tax=Medicago truncatula RepID=G7KEY2_MEDTR	3e-105	101.71	AT2G18250.1|Symbols:ATCOAD, COAD|4-phosphopantetheine adenylyltransferase|chr2:7940025-7941499 FORWARD LENGTH=176	5e-84	93.18	GO:0006629 GO:0006970 GO:0009058 GO:0009651 GO:0015937 GO:0019344 GO:0019915 GO:0040007 GO:0080020	biosynthetic process; coenzyme A biosynthetic process; cysteine biosynthetic process; growth; lipid metabolic process; lipid storage; regulation of coenzyme A biosynthetic process; response to osmotic stress; response to salt stress	GO:0003824 GO:0004140 GO:0004595 GO:0005524 GO:0016779	ATP binding; catalytic activity; dephospho-CoA kinase activity; nucleotidyltransferase activity; pantetheine-phosphate adenylyltransferase activity	GO:0005634 GO:0005829	cytosol; nucleus	PF01467	Cytidylyltransferase	PTHR24702	No Available Panther Description	NA	NA
Glyma.02G277000	280	UniRef100_K7KB58 Uncharacterized protein n=2 Tax=Glycine max RepID=K7KB58_SOYBN	0	100	UniRef100_I3TAY2 Nuclear transcription factor Y subunit C5 n=1 Tax=Medicago truncatula RepID=I3TAY2_MEDTR	6e-106	88.41	AT3G12480.1|Symbols:NF-YC11|nuclear factor Y, subunit C11|chr3:3958065-3960278 FORWARD LENGTH=293	1e-60	91.47	GO:0006355	regulation of transcription, DNA-dependent	GO:0003677 GO:0003700 GO:0043565	DNA binding; sequence-specific DNA binding; sequence-specific DNA binding transcription factor activity	GO:0005622 GO:0005634 GO:0005829	cytosol; intracellular; nucleus	PF00808	Histone-like transcription factor (CBF/NF-Y) and archaeal histone	PTHR10252	HISTONE-LIKE TRANSCRIPTION FACTOR CCAAT-RELATED	KOG1659	Class_2_transcription_repressor_NC2,_alpha_subunit_(DRAP1)
Glyma.02G277100	554	UniRef100_K7KB61 Uncharacterized protein n=2 Tax=Glycine max RepID=K7KB61_SOYBN	0	100	NA	NA	NA	AT4G03490.2|Symbols:|Ankyrin repeat family protein|chr4:1549345-1552754 REVERSE LENGTH=690	2e-10	35.65	NA	NA	NA	NA	NA	NA	NA	NA	NA	NA	NA	NA
Glyma.02G277200	590	UniRef100_I1JIU3 Uncharacterized protein n=1 Tax=Glycine max RepID=I1JIU3_SOYBN	0	100	UniRef100_G7KCS4 Nuclear control of ATPase protein n=1 Tax=Medicago truncatula RepID=G7KCS4_MEDTR	0	99.15	AT5G12290.1|Symbols:DGS1|dgd1 suppressor 1|chr5:3974374-3978066 REVERSE LENGTH=602	0	97.18	GO:0007155 GO:0009887 GO:0009888 GO:0010090 GO:0010228 GO:0010638 GO:0016926 GO:0019375 GO:0033044 GO:0045010 GO:0048765 GO:0050665 GO:0071555	actin nucleation; cell adhesion; cell wall organization; galactolipid biosynthetic process; hydrogen peroxide biosynthetic process; organ morphogenesis; positive regulation of organelle organization; protein desumoylation; regulation of chromosome organization; root hair cell differentiation; tissue development; trichome morphogenesis; vegetative to reproductive phase transition of meristem	NA	NA	GO:0005739 GO:0005741 GO:0009507 GO:0043234	chloroplast; mitochondrial outer membrane; mitochondrion; protein complex	PF08637	ATP synthase regulation protein NCA2	NA	NA	NA	NA
Glyma.02G277300	322	UniRef100_I1JIU4 Uncharacterized protein n=1 Tax=Glycine max RepID=I1JIU4_SOYBN	0	100	UniRef100_C6TLT7 Late-embryogenesis abundant protein 1 n=1 Tax=Glycine max RepID=C6TLT7_SOYBN	0	99.69	AT2G44060.2|Symbols:|Late embryogenesis abundant protein, group 2|chr2:18226922-18227988 FORWARD LENGTH=325	2e-164	93.85	GO:0000902 GO:0006094 GO:0006096 GO:0006970 GO:0009269 GO:0009651 GO:0009793 GO:0016049 GO:0019344 GO:0046686 GO:0048193	Golgi vesicle transport; cell growth; cell morphogenesis; cysteine biosynthetic process; embryo development ending in seed dormancy; gluconeogenesis; glycolysis; response to cadmium ion; response to desiccation; response to osmotic stress; response to salt stress	GO:0003674	molecular function	GO:0005634 GO:0005794 GO:0005829 GO:0005886 GO:0009506 GO:0016020	Golgi apparatus; cytosol; membrane; nucleus; plasma membrane; plasmodesma	PF03168	Late embryogenesis abundant protein	NA	NA	NA	NA
Glyma.02G277400	495	UniRef100_I1JIU6 Uncharacterized protein n=1 Tax=Glycine max RepID=I1JIU6_SOYBN	0	100	UniRef100_B4FKU4 Cyclin4 n=1 Tax=Zea mays RepID=B4FKU4_MAIZE	0	100	AT2G26770.2|Symbols:|plectin-related|chr2:11404257-11407743 REVERSE LENGTH=496	0	99.4	GO:0007015 GO:0010119 GO:0032880	actin filament organization; regulation of protein localization; regulation of stomatal movement	GO:0003779	actin binding	GO:0005634	nucleus	NA	NA	PTHR26369	No Available Panther Description	NA	NA
Glyma.02G277500	181	UniRef100_I1JIU9 Uncharacterized protein n=1 Tax=Glycine max RepID=I1JIU9_SOYBN	7e-127	100	UniRef100_B9GKT8 TATA BINDING protein ASSOCIATED FACTOR 21KDA SUBUNIT n=1 Tax=Populus trichocarpa RepID=B9GKT8_POPTR	1e-86	101.14	AT1G54140.1|Symbols:TAFII21, TAF9|TATA binding protein associated factor 21kDa subunit|chr1:20214076-20214869 REVERSE LENGTH=183	5e-73	96.72	GO:0000394 GO:0006352 GO:0006366 GO:0009560	DNA-dependent transcription, initiation; RNA splicing, via endonucleolytic cleavage and ligation; embryo sac egg cell differentiation; transcription from RNA polymerase II promoter	GO:0003677	DNA binding	GO:0005634 GO:0005669	nucleus; transcription factor TFIID complex	PF02291	Transcription initiation factor IID, 31kD subunit	PTHR12075	TRANSCRIPTION INITIATION FACTOR TFIID COMPONENT	KOG3334	Transcription_initiation_factor_TFIID,_subunit_TAF9_(also_component_of_histone_acetyltransferase_SAGA)
Glyma.02G277600	441	UniRef100_I1JIV0 Uncharacterized protein n=1 Tax=Glycine max RepID=I1JIV0_SOYBN	0	100	UniRef100_Q39880 Mitotic cyclin b1-type n=1 Tax=Glycine max RepID=Q39880_SOYBN	0	98.64	AT2G26760.1|Symbols:CYCB1;4|Cyclin B1;4|chr2:11401551-11403205 FORWARD LENGTH=387	2e-140	87.6	GO:0000079 GO:0010440 GO:0051726	regulation of cell cycle; regulation of cyclin-dependent protein serine/threonine kinase activity; stomatal lineage progression	GO:0005515 GO:0016538 GO:0019901	cyclin-dependent protein serine/threonine kinase regulator activity; protein binding; protein kinase binding	GO:0005634	nucleus	PF00134 PF02984	Cyclin, N-terminal domain; Cyclin, C-terminal domain	PTHR10177	CYCLINE	KOG0653	Cyclin_B_and_related_kinase-activating_proteins
Glyma.02G277700	235	UniRef100_I1JIV1 Uncharacterized protein n=1 Tax=Glycine max RepID=I1JIV1_SOYBN	2e-171	100	UniRef100_G7KCU0 Early nodulin-like protein n=1 Tax=Medicago truncatula RepID=G7KCU0_MEDTR	3e-110	95.42	AT1G08500.1|Symbols:ENODL18, AtENODL18|early nodulin-like protein 18|chr1:2689110-2689881 FORWARD LENGTH=228	2e-83	83.33	NA	NA	GO:0005507 GO:0009055	copper ion binding; electron carrier activity	GO:0005886 GO:0031225	anchored to membrane; plasma membrane	PF02298	Plastocyanin-like domain	NA	NA	NA	NA
Glyma.02G277800	114	UniRef100_C6T5D5 Uncharacterized protein n=1 Tax=Glycine max RepID=C6T5D5_SOYBN	2e-74	100	UniRef100_Q7XAE8 S2 self-incompatibility locus-linked pollen 3.2 protein n=1 Tax=Petunia integrifolia subsp. inflata RepID=Q7XAE8_PETIN	1e-11	35.81	AT5G12240.2|Symbols:|unknown protein; FUNCTIONS IN: molecular_function unknown; INVOLVED IN: biological_process unknown; LOCATED IN: cellular_component unknown; EXPRESSED IN: 19 plant structures; EXPRESSED DURING: 10 growth stages.|chr5:3959120-3960777 REVERSE LENGTH=114	1e-28	99.12	GO:0008150	biological process	GO:0003674	molecular function	GO:0005634 GO:0005829	cytosol; nucleus	NA	NA	NA	NA	NA	NA
Glyma.02G277900	434	UniRef100_K7KB71 Uncharacterized protein n=1 Tax=Glycine max RepID=K7KB71_SOYBN	0	100	UniRef100_G7IZR1 Hydroxymethylglutaryl-CoA lyase n=2 Tax=Medicago truncatula RepID=G7IZR1_MEDTR	0	99.54	AT2G26800.1|Symbols:|Aldolase superfamily protein|chr2:11429192-11432185 REVERSE LENGTH=433	0	99.54	GO:0006551	leucine metabolic process	GO:0003824 GO:0004419	catalytic activity; hydroxymethylglutaryl-CoA lyase activity	GO:0005739	mitochondrion	PF00682	HMGL-like	PTHR10277	HOMOCITRATE SYNTHASE-RELATED	KOG2368	Hydroxymethylglutaryl-CoA_lyase
Glyma.02G278000	82	UniRef100_E9L564 CLE18 protein n=1 Tax=Glycine max RepID=E9L564_SOYBN	3e-51	90	UniRef100_E9L564 CLE18 protein n=1 Tax=Glycine max RepID=E9L564_SOYBN	3e-51	90	AT5G12235.1|Symbols:CLE22|CLAVATA3/ESR-RELATED 22|chr5:3957740-3958051 FORWARD LENGTH=103	4e-06	24.27	GO:0001944 GO:0007165 GO:0010078 GO:0048364	maintenance of root meristem identity; root development; signal transduction; vasculature development	GO:0005102 GO:0033612	receptor binding; receptor serine/threonine kinase binding	GO:0005739 GO:0048046	apoplast; mitochondrion	NA	NA	NA	NA	NA	NA
Glyma.02G278100	107	UniRef100_K7KB73 Uncharacterized protein n=1 Tax=Glycine max RepID=K7KB73_SOYBN	6e-72	100	UniRef100_G7KGU9 Protein phosphatase 2C n=1 Tax=Medicago truncatula RepID=G7KGU9_MEDTR	3e-28	19.44	AT1G07430.1|Symbols:HAI2|highly ABA-induced PP2C gene 2|chr1:2281151-2282656 REVERSE LENGTH=442	5e-26	17.19	GO:0009738 GO:0009788 GO:0009939 GO:0010030 GO:0048838 GO:1902039	abscisic acid mediated signaling pathway; negative regulation of abscisic acid mediated signaling pathway; negative regulation of seed dormancy process; positive regulation of gibberellic acid mediated signaling pathway; positive regulation of seed germination; release of seed from dormancy	GO:0003824 GO:0004722	catalytic activity; protein serine/threonine phosphatase activity	GO:0005886 GO:0008287	plasma membrane; protein serine/threonine phosphatase complex	PF00481	Protein phosphatase 2C	PTHR13832	PROTEIN PHOSPHATASE 2C	NA	NA
Glyma.02G278200	341	UniRef100_UPI0003DE8246 PREDICTED: uncharacterized protein LOC102667373 n=1 Tax=Glycine max RepID=UPI0003DE8246	0	100	NA	NA	NA	AT2G26530.1|Symbols:AR781|Protein of unknown function (DUF1645)|chr2:11283036-11283989 REVERSE LENGTH=317	1e-08	57.73	GO:0006612 GO:0008150 GO:0009611 GO:0009612 GO:0009646 GO:0009863 GO:0009867 GO:0010200 GO:0010363	biological process; jasmonic acid mediated signaling pathway; protein targeting to membrane; regulation of plant-type hypersensitive response; response to absence of light; response to chitin; response to mechanical stimulus; response to wounding; salicylic acid mediated signaling pathway	GO:0003674	molecular function	GO:0005886 GO:0009507	chloroplast; plasma membrane	PF07816	Protein of unknown function (DUF1645)	NA	NA	NA	NA
Glyma.02G278300	398	UniRef100_I1JIV7 Uncharacterized protein n=1 Tax=Glycine max RepID=I1JIV7_SOYBN	0	100	UniRef100_G7KCV1 F-box family protein n=1 Tax=Medicago truncatula RepID=G7KCV1_MEDTR	0	99.5	AT2G32560.1|Symbols:|F-box family protein|chr2:13824820-13826761 FORWARD LENGTH=371	3e-149	107.01	GO:0008150	biological process	GO:0003674	molecular function	GO:0005576	extracellular region	PF00646	F-box domain	NA	NA	NA	NA
Glyma.02G278400	274	UniRef100_I1JIV9 Uncharacterized protein n=2 Tax=Glycine max RepID=I1JIV9_SOYBN	0	100	UniRef100_G7KCV7 Heat stress transcription factor B-4 n=1 Tax=Medicago truncatula RepID=G7KCV7_MEDTR	1e-134	105.91	AT1G46264.1|Symbols:AT-HSFB4, HSFB4, SCZ|heat shock transcription factor B4|chr1:17224904-17226183 FORWARD LENGTH=348	2e-86	70.69	GO:0006355 GO:0008356 GO:0009408	asymmetric cell division; regulation of transcription, DNA-dependent; response to heat	GO:0003677 GO:0003700 GO:0043565	DNA binding; sequence-specific DNA binding; sequence-specific DNA binding transcription factor activity	GO:0005634	nucleus	PF00447	HSF-type DNA-binding	PTHR10015	HEAT SHOCK TRANSCRIPTION FACTOR	KOG0627	Heat_shock_transcription_factor
Glyma.02G278500	638	UniRef100_I1JIW0 Uncharacterized protein n=1 Tax=Glycine max RepID=I1JIW0_SOYBN	0	100	UniRef100_G7KCV9 LAS1-like protein n=1 Tax=Medicago truncatula RepID=G7KCV9_MEDTR	0	105.64	AT5G12220.1|Symbols:|las1-like family protein|chr5:3950218-3953014 FORWARD LENGTH=611	2e-123	103.44	GO:0008150	biological process	GO:0003674	molecular function	GO:0005634	nucleus	PF04031	Las1-like	PTHR15002	UNCHARACTERIZED	KOG2425	Nuclear_protein_involved_in_cell_morphogenesis_and_cell_surface_growth
Glyma.02G278600	527	UniRef100_I1JIW1 Uncharacterized protein n=1 Tax=Glycine max RepID=I1JIW1_SOYBN	0	100	UniRef100_G7K315 Dihydropyrimidinase n=1 Tax=Medicago truncatula RepID=G7K315_MEDTR	0	96.86	AT5G12200.1|Symbols:PYD2|pyrimidine 2|chr5:3941700-3944727 REVERSE LENGTH=531	0	96.99	GO:0006208 GO:0006212 GO:0006635 GO:0016558 GO:0043562	cellular response to nitrogen levels; fatty acid beta-oxidation; protein import into peroxisome matrix; pyrimidine nucleobase catabolic process; uracil catabolic process	GO:0004157 GO:0016787 GO:0016810 GO:0016812	dihydropyrimidinase activity; hydrolase activity; hydrolase activity, acting on carbon-nitrogen (but not peptide) bonds; hydrolase activity, acting on carbon-nitrogen (but not peptide) bonds, in cyclic amides	GO:0005783 GO:0005794 GO:0012505	Golgi apparatus; endomembrane system; endoplasmic reticulum	PF01979	Amidohydrolase family	PTHR11647	AMINOHYDROLASE	KOG2584	Dihydroorotase_and_related_enzymes
Glyma.02G278700	110	UniRef100_I1JIW2 Uncharacterized protein n=1 Tax=Glycine max RepID=I1JIW2_SOYBN	5e-76	100	UniRef100_F4K158 RPM1-interacting protein 4 (RIN4) family protein n=1 Tax=Arabidopsis thaliana RepID=F4K158_ARATH	4e-19	93.94	AT5G19473.1|Symbols:|RPM1-interacting protein 4 (RIN4) family protein|chr5:6569268-6570680 FORWARD LENGTH=99	4e-22	93.94	GO:0008150	biological process	GO:0003674	molecular function	GO:0005634	nucleus	PF05627	Cleavage site for pathogenic type III effector avirulence factor Avr	NA	NA	NA	NA
Glyma.02G278800	125	UniRef100_I1JIW3 Uncharacterized protein n=2 Tax=Phaseoleae RepID=I1JIW3_SOYBN	3e-85	100	UniRef100_G7K318 Pre-mRNA branch site p14-like protein n=1 Tax=Medicago truncatula RepID=G7K318_MEDTR	3e-83	97.62	AT5G12190.1|Symbols:|RNA-binding (RRM/RBD/RNP motifs) family protein|chr5:3940731-3941105 REVERSE LENGTH=124	4e-79	100	GO:0008150	biological process	GO:0000166 GO:0003676 GO:0003723	RNA binding; nucleic acid binding; nucleotide binding	GO:0005634	nucleus	PF00076	RNA recognition motif. (a.k.a. RRM, RBD, or RNP domain)	PTHR22630	PRE-MRNA BRANCH SITE PROTEIN	KOG0114	Predicted_RNA-binding_protein_(RRM_superfamily)
Glyma.02G278900	528	UniRef100_I1JIW4 Uncharacterized protein n=1 Tax=Glycine max RepID=I1JIW4_SOYBN	0	100	UniRef100_G7K320 Calcium dependent protein kinase n=1 Tax=Medicago truncatula RepID=G7K320_MEDTR	0	100.76	AT5G12180.1|Symbols:CPK17|calcium-dependent protein kinase 17|chr5:3937136-3939323 FORWARD LENGTH=528	0	99.05	GO:0006468 GO:0006499 GO:0046777 GO:0080092	N-terminal protein myristoylation; protein autophosphorylation; protein phosphorylation; regulation of pollen tube growth	GO:0004672 GO:0004674 GO:0004683 GO:0005509 GO:0005524 GO:0016301 GO:0016772	ATP binding; calcium ion binding; calmodulin-dependent protein kinase activity; kinase activity; protein kinase activity; protein serine/threonine kinase activity; transferase activity, transferring phosphorus-containing groups	GO:0005634 GO:0005737 GO:0005886	cytoplasm; nucleus; plasma membrane	PF00069 PF00036	Protein kinase domain; EF hand	PTHR24349	SERINE/THREONINE-PROTEIN KINASE	KOG0032	Ca2+/calmodulin-dependent_protein_kinase,_EF-Hand_protein_superfamily
Glyma.02G279000	293	UniRef100_C6T9G3 Uncharacterized protein n=1 Tax=Glycine max RepID=C6T9G3_SOYBN	0	100	UniRef100_G7K321 Peptidyl-prolyl cis-trans isomerase C n=2 Tax=Medicago truncatula RepID=G7K321_MEDTR	4e-143	44.84	AT5G19370.1|Symbols:|rhodanese-like domain-containing protein / PPIC-type PPIASE domain-containing protein|chr5:6524247-6526629 REVERSE LENGTH=299	4e-101	69.57	NA	NA	GO:0016853	isomerase activity	GO:0009507	chloroplast	PF00581 PF00639	Rhodanese-like domain; PPIC-type PPIASE domain	PTHR10657	PEPTIDYL-PROLYL CIS-TRANS ISOMERASE	KOG3258	Parvulin-like_peptidyl-prolyl_cis-trans_isomerase
Glyma.02G279100	220	UniRef100_I1JIW7 Uncharacterized protein n=1 Tax=Glycine max RepID=I1JIW7_SOYBN	9e-162	100	UniRef100_G7K325 Vesicle-associated membrane protein 7C n=1 Tax=Medicago truncatula RepID=G7K325_MEDTR	7e-141	100	AT5G11150.1|Symbols:ATVAMP713, VAMP713|vesicle-associated membrane protein 713|chr5:3546625-3547844 REVERSE LENGTH=221	2e-139	99.1	GO:0006810 GO:0009651 GO:0016192	response to salt stress; transport; vesicle-mediated transport	GO:0003674	molecular function	GO:0005773 GO:0005774 GO:0005794 GO:0016020 GO:0016021	Golgi apparatus; integral to membrane; membrane; vacuolar membrane; vacuole	PF00957	Synaptobrevin	PTHR21136	SNARE PROTEINS	KOG0859	Synaptobrevin/VAMP-like_protein
Glyma.02G279200	61	NA	NA	NA	NA	NA	NA	NA	NA	NA	NA	NA	NA	NA	NA	NA	NA	NA	NA	NA	NA	NA
Glyma.02G279300	871	UniRef100_K7KB77 Uncharacterized protein n=1 Tax=Glycine max RepID=K7KB77_SOYBN	0	100	UniRef100_G7K336 Rho GTPase-activating protein n=1 Tax=Medicago truncatula RepID=G7K336_MEDTR	0	94.57	AT5G19390.2|Symbols:|Rho GTPase activation protein (RhoGAP) with PH domain|chr5:6531906-6538206 FORWARD LENGTH=870	0	100	GO:0007165	signal transduction	GO:0005100 GO:0005543 GO:0035091	Rho GTPase activator activity; phosphatidylinositol binding; phospholipid binding	GO:0005622 GO:0005737 GO:0009507 GO:0009535	chloroplast; chloroplast thylakoid membrane; cytoplasm; intracellular	PF00620 PF00169	RhoGAP domain; PH domain	PTHR23176	RHO/RAC/CDC GTPASE-ACTIVATING PROTEIN	KOG4271	Rho-GTPase_activating_protein
Glyma.02G279400	141	UniRef100_C6T5P0 Uncharacterized protein n=1 Tax=Glycine max RepID=C6T5P0_SOYBN	5e-90	100	UniRef100_B9MXZ3 Got1-like family protein n=1 Tax=Populus trichocarpa RepID=B9MXZ3_POPTR	4e-80	100	AT5G01430.2|Symbols:|Got1/Sft2-like vescicle transport protein family|chr5:176797-178010 REVERSE LENGTH=140	7e-80	100	GO:0016192	vesicle-mediated transport	GO:0003674	molecular function	GO:0005886	plasma membrane	PF04178	Got1/Sft2-like family	PTHR21493	CGI-141-RELATED/LIPASE CONTAINING PROTEIN	KOG1743	Ferric_reductase-like_proteins
Glyma.02G279500	950	UniRef100_V7B9E9 Uncharacterized protein n=1 Tax=Phaseolus vulgaris RepID=V7B9E9_PHAVU	0	100.64	UniRef100_G7K338 Telomerase-binding protein EST1A n=1 Tax=Medicago truncatula RepID=G7K338_MEDTR	0	97.72	AT5G19400.2|Symbols:SMG7|Telomerase activating protein Est1|chr5:6540603-6544262 FORWARD LENGTH=1059	0	66.19	GO:0000184 GO:0007126 GO:0090306	meiosis; nuclear-transcribed mRNA catabolic process, nonsense-mediated decay; spindle assembly involved in meiosis	GO:0003674	molecular function	GO:0000932 GO:0005634	cytoplasmic mRNA processing body; nucleus	PF10374	Telomerase activating protein Est1	PTHR15696	SMG-7 (SUPPRESSOR WITH MORPHOLOGICAL EFFECT ON GENITALIA PROTEIN 7)	NA	NA
Glyma.02G279600	357	UniRef100_K7KB80 Uncharacterized protein n=1 Tax=Glycine max RepID=K7KB80_SOYBN	0	100	UniRef100_E9KID2 Root determined nodulation 1 n=2 Tax=Medicago truncatula RepID=E9KID2_MEDTR	0	99.72	AT5G13500.3|Symbols:|unknown protein; FUNCTIONS IN: molecular_function unknown; INVOLVED IN: biological_process unknown; LOCATED IN: endomembrane system; EXPRESSED IN: 22 plant structures; EXPRESSED DURING: 13 growth stages; BEST Arabidopsis thaliana protein match is: unknown protein (TAIR:AT5G25265.1); Has 35333 Blast hits to 34131 proteins in 2444 species: Archae - 798; Bacteria - 22429; Metazo…	0	96.93	GO:0008150	biological process	GO:0016757	transferase activity, transferring glycosyl groups	GO:0005768 GO:0005794 GO:0005802	Golgi apparatus; endosome; trans-Golgi network	NA	NA	NA	NA	NA	NA
Glyma.02G279700	75	UniRef100_K7KB81 Uncharacterized protein n=1 Tax=Glycine max RepID=K7KB81_SOYBN	8e-44	60.16	NA	NA	NA	NA	NA	NA	NA	NA	NA	NA	NA	NA	NA	NA	NA	NA	NA	NA
(1) GlymaID from Gmax version 2.0. Only primary predicted proteins were included in analyses. For more information on Gmax2.0 cDNAs see http://phytozome.jgi.doe.gov/pz/portal.html#!info?alias=Org_Gmax.
(2) Top Uniref100 BLASTP Hit. Match determined via BLASTP of Gmax2.0 primary proteins against Uniref100 (version 03/27/2014). E-value for the top high scoring pair(HSP) is indicated. Top Uniref100 percent coverage determined by dividing the length of the top HSP by the length of the hit sequence.
(3) Top Descriptive Uniref100 BLASTP Hit. The BLAST report generated above (2) was parsed to eliminate uninformative hits. Hits including the words uncharacterized, putative, related, predicted, orf, expressed or containing Arabidopsis or Rice gene identifiers (AtXgXXXXX, OsXXgXXXXX) were ignored. E-value for the top high scoring pair(HSP) is indicated. Top Uniref100 percent coverage determined b…
(4) Top Arabidopsis (TAIR10) BLASTP Hit (4). Match determined via BLASTP of Gmax2.0 primary proteins against Arabidopsis thaliana proteins (TAIR10). For additional details see www.arabidopsis.org. E-value for the top high scoring pair(HSP) is indicated. Percent coverage determined by dividing the length of the top HSP by the length of the hit sequence.
(5) Gene Ontology Biological Process IDs. GO Biological Process IDs were assigned to each Gmax2.0 ID using the GO terms associated with the Top TAIR10 BLASTP Hit (4). The annotation information was obtained from TAIR v 10 (03/27/14). Descriptions for the GO terms are also provided.
(6) Gene Ontology Molecular Function IDs. GO Molecular Function IDs were assigned to each Gmax2.0 ID using the GO terms associated with the Top TAIR10 BLASTP Hit (4). The annotation information was obtained from TAIR v. 10 (03/27/14). Descriptions for the GO terms are also provided.
(7) Gene Ontology Cellular Component IDs. GO Cellular Component IDs were assigned to each Gmax2.0 ID using the GO terms associated with the Top TAIR10 BLASTP Hit (4). The annotation information was obtained from TAIR v 10 (03/27/14). Descriptions for the GO terms are also provided.
(8) PFAM IDs and descriptions were assigned by Phytozome. For more information see http://phytozome.jgi.doe.gov/pz/portal.html#!info?alias=Org_Gmax.
(9) PANTHER IDs and descriptions were assigned by Phytozome. For more information see http://phytozome.jgi.doe.gov/pz/portal.html#!info?alias=Org_Gmax.
(10) KOG IDs and descriptions were assigned by Phytozome. For more information see http://phytozome.jgi.doe.gov/pz/portal.html#!info?alias=Org_Gmax.
