# Supplementary material for: A Major and Stable Quantitative Trait Locus qSS2 for Seed Size and Shape Traits in a Soybean RIL Population
Source: Front Genet. 2021 Apr 16;12:646102. doi: 10.3389/fgene.2021.646102 (PMC8085556; doi:10.3389/fgene.2021.646102)
Supplement: Supplementary Table 9 — Predictive candidate genes in qSS2. [file Table_9.XLSX]

## Sheet: Sheet1
Table S9. Predictive candidate genes in qSS2
Gmax 2.0 Primary Protein ID (1)	Protein Length (AA)	Top Descriptive Uniref100 BLASTP Hit (3)	Top Arabidopsis (TAIR10) BLASTP Hit (4)	Gene Ontology Biological Process IDs (5)	Gene Ontology Biological Process Descriptions	Gene Ontology Molecular Function IDs (6)	Gene Ontology Molecular Function Descriptions	Gene Ontology Cellular Component IDs (7)	Gene Ontology Cellular Component Descriptions	PFAM IDs (8)	PFAM_Descriptions	Panther IDs (9)	Panther_Descriptions	KOG IDs (10)	KOG_Desctiptions
Glyma.02G269000	473	UniRef100_G7K7I0 Glucan endo-1,3-beta-glucosidase n=1 Tax=Medicago truncatula RepID=G7K7I0_MEDTR	AT2G05790.1|Symbols:|O-Glycosyl hydrolases family 17 protein|chr2:2199450-2201293 FORWARD LENGTH=472	GO:0005975 GO:0007389 GO:0008356 GO:0008361 GO:0009926 GO:0010015 GO:0010075 GO:0040007	asymmetric cell division; auxin polar transport; carbohydrate metabolic process; growth; pattern specification process; regulation of cell size; regulation of meristem growth; root morphogenesis	GO:0003824 GO:0004553 GO:0043169	catalytic activity; cation binding; hydrolase activity, hydrolyzing O-glycosyl compounds	GO:0005886	plasma membrane	PF07983 PF00332	X8 domain; Glycosyl hydrolases family 17	PTHR16631	FAMILY NOT NAMED	NA	NA
Glyma.02G269400	525	UniRef100_G7K7J2 Endoglucanase n=1 Tax=Medicago truncatula RepID=G7K7J2_MEDTR	AT2G32990.1|Symbols:AtGH9B8, GH9B8|glycosyl hydrolase 9B8|chr2:14003361-14005844 FORWARD LENGTH=525	GO:0005975	carbohydrate metabolic process	GO:0003824 GO:0004553	catalytic activity; hydrolase activity, hydrolyzing O-glycosyl compounds	GO:0005576	extracellular region	PF00759	Glycosyl hydrolase family 9	PTHR22298	ENDO-1,4-BETA-GLUCANASE	NA	NA
Glyma.02G269900	296	UniRef100_A5Y4H1 Class I KNOX homeobox transcription factor n=3 Tax=Medicago truncatula RepID=A5Y4H1_MEDTR	AT1G62360.1|Symbols:STM, BUM1, SHL, WAM1, BUM, WAM|KNOX/ELK homeobox transcription factor|chr1:23058796-23061722 REVERSE LENGTH=382	GO:0006355 GO:0007389 GO:0009691 GO:0009855 GO:0009886 GO:0009887 GO:0009909 GO:0009934 GO:0010051 GO:0010093 GO:0019827 GO:0048438 GO:0048439 GO:0048440 GO:0048481 GO:0048507 GO:0048513 GO:0048519	carpel development; cytokinin biosynthetic process; determination of bilateral symmetry; floral whorl development; flower morphogenesis; meristem development; negative regulation of biological process; organ development; organ morphogenesis; ovule development; pattern specification process; post-embryonic morphogenesis; regulation of flower development; regulation of meristem structural organizat…	GO:0003677 GO:0003700 GO:0005515 GO:0043565	DNA binding; protein binding; sequence-specific DNA binding; sequence-specific DNA binding transcription factor activity	GO:0005634	nucleus	PF00046 PF03791 PF03790	Homeobox domain; KNOX2 domain ; KNOX1 domain	PTHR11850	HOMEOBOX PROTEIN TRANSCRIPTION FACTORS	KOG0773	Transcription_factor_MEIS1_and_related_HOX_domain_proteins
Glyma.02G270300	538	UniRef100_B9GTV0 Serine/threonine protein phosphatase 2A regulatory subunit B n=1 Tax=Populus trichocarpa RepID=B9GTV0_POPTR	AT4G15415.1|Symbols:ATB' GAMMA|Protein phosphatase 2A regulatory B subunit family protein|chr4:8817707-8819349 FORWARD LENGTH=522	GO:0006555 GO:0007165 GO:0010090 GO:0031348 GO:0090342	methionine metabolic process; negative regulation of defense response; regulation of cell aging; signal transduction; trichome morphogenesis	GO:0008266 GO:0008601	poly(U) RNA binding; protein phosphatase type 2A regulator activity	GO:0000159 GO:0005634	nucleus; protein phosphatase type 2A complex	PF01603	Protein phosphatase 2A regulatory B subunit (B56 family)	PTHR10257	SERINE/THREONINE PROTEIN PHOSPHATASE 2A (PP2A) REGULATORY SUBUNIT B	KOG2085	Serine/threonine_protein_phosphatase_2A,_regulatory_subunit
Glyma.02G271600	511	UniRef100_G7IVN5 Pentatricopeptide repeat-containing protein n=1 Tax=Medicago truncatula RepID=G7IVN5_MEDTR	AT3G49730.1|Symbols:|Tetratricopeptide repeat (TPR)-like superfamily protein|chr3:18445730-18447646 REVERSE LENGTH=638	GO:0007131 GO:0009560 GO:0009691	cytokinin biosynthetic process; embryo sac egg cell differentiation; reciprocal meiotic recombination	NA	NA	GO:0005739	mitochondrion	PF01535	PPR repeat	PTHR24015	FAMILY NOT NAMED	NA	NA
Glyma.02G271800	286	UniRef100_Q2HS41 rRNA-processing protein UTP23-like protein n=2 Tax=Medicago truncatula RepID=Q2HS41_MEDTR	AT2G34570.1|Symbols:MEE21|PIN domain-like family protein|chr2:14563048-14564681 REVERSE LENGTH=281	GO:0009220 GO:0009793	embryo development ending in seed dormancy; pyrimidine ribonucleotide biosynthetic process	GO:0003674	molecular function	GO:0005634	nucleus	PF04900	Fcf1	PTHR12416	UNCHARACTERIZED	KOG3164	Uncharacterized_proteins_of_PilT_N-term./Vapc_superfamily
Glyma.02G272100	651	UniRef100_G7J6L9 Beta-D-glucosidase n=1 Tax=Medicago truncatula RepID=G7J6L9_MEDTR	AT5G20950.2|Symbols:|Glycosyl hydrolase family protein|chr5:7107609-7110775 REVERSE LENGTH=624	GO:0005975 GO:0009627 GO:0034976	carbohydrate metabolic process; response to endoplasmic reticulum stress; systemic acquired resistance	GO:0004553	hydrolase activity, hydrolyzing O-glycosyl compounds	GO:0005576 GO:0005618 GO:0009505 GO:0009506 GO:0016020	cell wall; extracellular region; membrane; plant-type cell wall; plasmodesma	PF01915 PF00933	Glycosyl hydrolase family 3 C-terminal domain; Glycosyl hydrolase family 3 N terminal domain	NA	NA	NA	NA
Glyma.02G272700	653	UniRef100_G3ECQ4 Rfls1 protein n=1 Tax=Glycine max RepID=G3ECQ4_SOYBN	AT5G20990.1|Symbols:B73, SIR4, CNX, CHL6, CNX1|molybdopterin biosynthesis CNX1 protein / molybdenum cofactor biosynthesis enzyme CNX1 (CNX1)|chr5:7128737-7133397 REVERSE LENGTH=670	GO:0000165 GO:0006612 GO:0006777 GO:0007154 GO:0009409 GO:0009734 GO:0009738 GO:0009862 GO:0009867 GO:0010363 GO:0030968 GO:0031348 GO:0032324 GO:0043069 GO:0050832	MAPK cascade; Mo-molybdopterin cofactor biosynthetic process; abscisic acid mediated signaling pathway; auxin mediated signaling pathway; cell communication; defense response to fungus; endoplasmic reticulum unfolded protein response; jasmonic acid mediated signaling pathway; molybdopterin cofactor biosynthetic process; negative regulation of defense response; negative regulation of programmed ce…	GO:0030151	molybdenum ion binding	GO:0005737 GO:0005829	cytoplasm; cytosol	PF00994 PF03454 PF03453	Probable molybdopterin binding domain; MoeA C-terminal region (domain IV); MoeA N-terminal region (domain I and II)	PTHR10192	MOLYBDOPTERIN BIOSYNTHESIS PROTEIN	KOG2371	Molybdopterin_biosynthesis_protein
Glyma.02G273900	378	UniRef100_G7K2X1 GDSL esterase/lipase n=1 Tax=Medicago truncatula RepID=G7K2X1_MEDTR	AT4G10950.1|Symbols:|SGNH hydrolase-type esterase superfamily protein|chr4:6711502-6713512 REVERSE LENGTH=400	GO:0006629	lipid metabolic process	GO:0004091 GO:0016788	carboxylesterase activity; hydrolase activity, acting on ester bonds	GO:0005576	extracellular region	PF00657	GDSL-like Lipase/Acylhydrolase	PTHR22835	ZINC FINGER FYVE DOMAIN CONTAINING PROTEIN	NA	NA
Glyma.02G274400	274	UniRef100_G7K2X8 Avr9/Cf-9 rapidly elicited protein n=1 Tax=Medicago truncatula RepID=G7K2X8_MEDTR	AT2G27080.2|Symbols:|Late embryogenesis abundant (LEA) hydroxyproline-rich glycoprotein family|chr2:11566383-11567165 FORWARD LENGTH=260	GO:0008150	biological process	GO:0003674	molecular function	GO:0005886 GO:0009506	plasma membrane; plasmodesma	PF03168	Late embryogenesis abundant protein	NA	NA	NA	NA
Glyma.02G274600	615	UniRef100_Q8SA69 Transcription factor EIL1 n=1 Tax=Vigna radiata RepID=Q8SA69_VIGRA	AT3G20770.1|Symbols:EIN3, AtEIN3|Ethylene insensitive 3 family protein|chr3:7260702-7262588 REVERSE LENGTH=628	GO:0000303 GO:0006355 GO:0006487 GO:0007165 GO:0008219 GO:0009639 GO:0009651 GO:0009723 GO:0009733 GO:0009737 GO:0009743 GO:0009751 GO:0009755 GO:0009863 GO:0009873 GO:0010182 GO:0042742 GO:0048825 GO:0071281	cell death; cellular response to iron ion; cotyledon development; defense response to bacterium; ethylene mediated signaling pathway; hormone-mediated signaling pathway; protein N-linked glycosylation; regulation of transcription, DNA-dependent; response to abscisic acid stimulus; response to auxin stimulus; response to carbohydrate stimulus; response to ethylene stimulus; response to red or far …	GO:0003677 GO:0003700 GO:0005515	DNA binding; protein binding; sequence-specific DNA binding transcription factor activity	GO:0005634	nucleus	PF04873	Ethylene insensitive 3	NA	NA	NA	NA
Glyma.02G274900	907	UniRef100_G7K2Y8 Protein argonaute 4 n=2 Tax=Medicago truncatula RepID=G7K2Y8_MEDTR	AT2G27040.2|Symbols:AGO4|Argonaute family protein|chr2:11536795-11541503 REVERSE LENGTH=924	GO:0000023 GO:0000226 GO:0000278 GO:0000724 GO:0000911 GO:0006260 GO:0006261 GO:0006275 GO:0006306 GO:0006342 GO:0006346 GO:0007267 GO:0008283 GO:0009555 GO:0009616 GO:0009816 GO:0009855 GO:0009909 GO:0009965 GO:0010014 GO:0010073 GO:0010267 GO:0016246 GO:0016444 GO:0016458 GO:0016568 GO:0016569 GO:0016570 GO:0016572 GO:0019252 GO:0030422 GO:0031047 GO:0031048 GO:0034968 GO:0035196 GO:0043085 GO:…	DNA-dependent DNA replication; DNA methylation; DNA replication; RNA interference; cell-cell signaling; cell proliferation; chromatin modification; chromatin silencing; chromatin silencing by small RNA; covalent chromatin modification; cytokinesis by cell plate formation; defense response to bacterium, incompatible interaction; determination of bilateral symmetry; double-strand break repair via h…	GO:0005515 GO:0035197	protein binding; siRNA binding	GO:0005634 GO:0005719 GO:0005730 GO:0015030	Cajal body; nuclear euchromatin; nucleolus; nucleus	PF02171 PF02170 PF08699	Piwi domain; PAZ domain; Domain of unknown function (DUF1785)	PTHR22891	EUKARYOTIC TRANSLATION INITIATION FACTOR 2C	KOG1041	Translation_initiation_factor_2C_(eIF-2C)_and_related_proteins
Glyma.02G275500	284	UniRef100_Q7XYX8 AKIN beta1 n=1 Tax=Medicago truncatula RepID=Q7XYX8_MEDTR	AT5G21170.1|Symbols:AKINBETA1|5'-AMP-activated protein kinase beta-2 subunit protein|chr5:7205718-7208239 FORWARD LENGTH=283	GO:0006499 GO:0009744 GO:0009750 GO:0043562	N-terminal protein myristoylation; cellular response to nitrogen levels; response to fructose stimulus; response to sucrose stimulus	GO:0004679 GO:0005515	AMP-activated protein kinase activity; protein binding	GO:0005737	cytoplasm	PF04739	5'-AMP-activated protein kinase beta subunit, interation domain	PTHR10343	5'-AMP-ACTIVATED PROTEIN KINASE , BETA SUBUNIT	KOG1616	Protein_involved_in_Snf1_protein_kinase_complex_assembly
Glyma.02G275900	473	UniRef100_A7BJ79 CBL-interacting protein kinase n=1 Tax=Vigna unguiculata RepID=A7BJ79_VIGUN	AT2G26980.3|Symbols:CIPK3|CBL-interacting protein kinase 3|chr2:11515234-11518205 REVERSE LENGTH=441	GO:0006468 GO:0007165 GO:0009735 GO:0009737 GO:0009738 GO:0009845	abscisic acid mediated signaling pathway; protein phosphorylation; response to abscisic acid stimulus; response to cytokinin stimulus; seed germination; signal transduction	GO:0004672 GO:0004674 GO:0004713 GO:0005524 GO:0016301 GO:0016772	ATP binding; kinase activity; protein kinase activity; protein serine/threonine kinase activity; protein tyrosine kinase activity; transferase activity, transferring phosphorus-containing groups	GO:0005634 GO:0005737 GO:0005886	cytoplasm; nucleus; plasma membrane	PF00069 PF03822	Protein kinase domain; NAF domain	PTHR24345	SERINE/THREONINE-PROTEIN KINASE PLK	KOG0583	Serine/threonine_protein_kinase
Glyma.02G276000	517	UniRef100_B9HDG3 Cdc2 family protein n=1 Tax=Populus trichocarpa RepID=B9HDG3_POPTR	AT5G10270.1|Symbols:CDKC;1|cyclin-dependent kinase C;1|chr5:3221715-3224674 REVERSE LENGTH=505	GO:0006468 GO:0009615 GO:0010228 GO:0048366	leaf development; protein phosphorylation; response to virus; vegetative to reproductive phase transition of meristem	GO:0004672 GO:0004674 GO:0005515 GO:0005524 GO:0016301 GO:0016772	ATP binding; kinase activity; protein binding; protein kinase activity; protein serine/threonine kinase activity; transferase activity, transferring phosphorus-containing groups	GO:0005634 GO:0005829	cytosol; nucleus	PF00069	Protein kinase domain	PTHR24056	CELL DIVISION PROTEIN KINASE	KOG0600	Cdc2-related_protein_kinase
Glyma.02G276200	873	UniRef100_G7K7S1 Pentatricopeptide repeat-containing protein n=1 Tax=Medicago truncatula RepID=G7K7S1_MEDTR	AT1G71210.1|Symbols:|Pentatricopeptide repeat (PPR) superfamily protein|chr1:26838850-26841489 REVERSE LENGTH=879	GO:0008150	biological process	NA	NA	GO:0005739	mitochondrion	PF01535	PPR repeat	PTHR24015	FAMILY NOT NAMED	NA	NA
Glyma.02G277200	590	UniRef100_G7KCS4 Nuclear control of ATPase protein n=1 Tax=Medicago truncatula RepID=G7KCS4_MEDTR	AT5G12290.1|Symbols:DGS1|dgd1 suppressor 1|chr5:3974374-3978066 REVERSE LENGTH=602	GO:0007155 GO:0009887 GO:0009888 GO:0010090 GO:0010228 GO:0010638 GO:0016926 GO:0019375 GO:0033044 GO:0045010 GO:0048765 GO:0050665 GO:0071555	actin nucleation; cell adhesion; cell wall organization; galactolipid biosynthetic process; hydrogen peroxide biosynthetic process; organ morphogenesis; positive regulation of organelle organization; protein desumoylation; regulation of chromosome organization; root hair cell differentiation; tissue development; trichome morphogenesis; vegetative to reproductive phase transition of meristem	NA	NA	GO:0005739 GO:0005741 GO:0009507 GO:0043234	chloroplast; mitochondrial outer membrane; mitochondrion; protein complex	PF08637	ATP synthase regulation protein NCA2	NA	NA	NA	NA
Glyma.02G277300	322	UniRef100_C6TLT7 Late-embryogenesis abundant protein 1 n=1 Tax=Glycine max RepID=C6TLT7_SOYBN	AT2G44060.2|Symbols:|Late embryogenesis abundant protein, group 2|chr2:18226922-18227988 FORWARD LENGTH=325	GO:0000902 GO:0006094 GO:0006096 GO:0006970 GO:0009269 GO:0009651 GO:0009793 GO:0016049 GO:0019344 GO:0046686 GO:0048193	Golgi vesicle transport; cell growth; cell morphogenesis; cysteine biosynthetic process; embryo development ending in seed dormancy; gluconeogenesis; glycolysis; response to cadmium ion; response to desiccation; response to osmotic stress; response to salt stress	GO:0003674	molecular function	GO:0005634 GO:0005794 GO:0005829 GO:0005886 GO:0009506 GO:0016020	Golgi apparatus; cytosol; membrane; nucleus; plasma membrane; plasmodesma	PF03168	Late embryogenesis abundant protein	NA	NA	NA	NA
Glyma.02G277600	441	UniRef100_Q39880 Mitotic cyclin b1-type n=1 Tax=Glycine max RepID=Q39880_SOYBN	AT2G26760.1|Symbols:CYCB1;4|Cyclin B1;4|chr2:11401551-11403205 FORWARD LENGTH=387	GO:0000079 GO:0010440 GO:0051726	regulation of cell cycle; regulation of cyclin-dependent protein serine/threonine kinase activity; stomatal lineage progression	GO:0005515 GO:0016538 GO:0019901	cyclin-dependent protein serine/threonine kinase regulator activity; protein binding; protein kinase binding	GO:0005634	nucleus	PF00134 PF02984	Cyclin, N-terminal domain; Cyclin, C-terminal domain	PTHR10177	CYCLINE	KOG0653	Cyclin_B_and_related_kinase-activating_proteins
Glyma.02G278000	82	UniRef100_E9L564 CLE18 protein n=1 Tax=Glycine max RepID=E9L564_SOYBN	AT5G12235.1|Symbols:CLE22|CLAVATA3/ESR-RELATED 22|chr5:3957740-3958051 FORWARD LENGTH=103	GO:0001944 GO:0007165 GO:0010078 GO:0048364	maintenance of root meristem identity; root development; signal transduction; vasculature development	GO:0005102 GO:0033612	receptor binding; receptor serine/threonine kinase binding	GO:0005739 GO:0048046	apoplast; mitochondrion	NA	NA	NA	NA	NA	NA
Glyma.02G278100	107	UniRef100_G7KGU9 Protein phosphatase 2C n=1 Tax=Medicago truncatula RepID=G7KGU9_MEDTR	AT1G07430.1|Symbols:HAI2|highly ABA-induced PP2C gene 2|chr1:2281151-2282656 REVERSE LENGTH=442	GO:0009738 GO:0009788 GO:0009939 GO:0010030 GO:0048838 GO:1902039	abscisic acid mediated signaling pathway; negative regulation of abscisic acid mediated signaling pathway; negative regulation of seed dormancy process; positive regulation of gibberellic acid mediated signaling pathway; positive regulation of seed germination; release of seed from dormancy	GO:0003824 GO:0004722	catalytic activity; protein serine/threonine phosphatase activity	GO:0005886 GO:0008287	plasma membrane; protein serine/threonine phosphatase complex	PF00481	Protein phosphatase 2C	PTHR13832	PROTEIN PHOSPHATASE 2C	NA	NA
Glyma.02G278500	638	UniRef100_G7KCV9 LAS1-like protein n=1 Tax=Medicago truncatula RepID=G7KCV9_MEDTR	AT5G12220.1|Symbols:|las1-like family protein|chr5:3950218-3953014 FORWARD LENGTH=611	GO:0008150	biological process	GO:0003674	molecular function	GO:0005634	nucleus	PF04031	Las1-like	PTHR15002	UNCHARACTERIZED	KOG2425	Nuclear_protein_involved_in_cell_morphogenesis_and_cell_surface_growth
(1) GlymaID from Gmax version 2.0. Only primary predicted proteins were included in analyses. For more information on Gmax2.0 cDNAs see http://phytozome.jgi.doe.gov/pz/portal.html#!info?alias=Org_Gmax.
(3) Top Descriptive Uniref100 BLASTP Hit. The BLAST report generated above (2) was parsed to eliminate uninformative hits. Hits including the words uncharacterized, putative, related, predicted, orf, expressed or containing Arabidopsis or Rice gene identifiers (AtXgXXXXX, OsXXgXXXXX) were ignored. E-value for the top high scoring pair(HSP) is indicated. Top Uniref100 percent coverage determined b…
(4) Top Arabidopsis (TAIR10) BLASTP Hit (4). Match determined via BLASTP of Gmax2.0 primary proteins against Arabidopsis thaliana proteins (TAIR10). For additional details see www.arabidopsis.org. E-value for the top high scoring pair(HSP) is indicated. Percent coverage determined by dividing the length of the top HSP by the length of the hit sequence.
(5) Gene Ontology Biological Process IDs. GO Biological Process IDs were assigned to each Gmax2.0 ID using the GO terms associated with the Top TAIR10 BLASTP Hit (4). The annotation information was obtained from TAIR v 10 (03/27/14). Descriptions for the GO terms are also provided.
(6) Gene Ontology Molecular Function IDs. GO Molecular Function IDs were assigned to each Gmax2.0 ID using the GO terms associated with the Top TAIR10 BLASTP Hit (4). The annotation information was obtained from TAIR v. 10 (03/27/14). Descriptions for the GO terms are also provided.
(7) Gene Ontology Cellular Component IDs. GO Cellular Component IDs were assigned to each Gmax2.0 ID using the GO terms associated with the Top TAIR10 BLASTP Hit (4). The annotation information was obtained from TAIR v 10 (03/27/14). Descriptions for the GO terms are also provided.
(8) PFAM IDs and descriptions were assigned by Phytozome. For more information see http://phytozome.jgi.doe.gov/pz/portal.html#!info?alias=Org_Gmax.
(9) PANTHER IDs and descriptions were assigned by Phytozome. For more information see http://phytozome.jgi.doe.gov/pz/portal.html#!info?alias=Org_Gmax.
(10) KOG IDs and descriptions were assigned by Phytozome. For more information see http://phytozome.jgi.doe.gov/pz/portal.html#!info?alias=Org_Gmax.
